# Supplementary material for: The Use of Wearable Sensors for Preventing, Assessing, and Informing Recovery from Sport-Related Musculoskeletal Injuries: A Systematic Scoping Review
Source: Sensors (Basel). 2022 Apr 22;22(9):3225. doi: 10.3390/s22093225 (PMC9105988; doi:10.3390/s22093225)
Supplement: Supplementary file 1 [file sensors-22-03225-s001.zip › Table S2.xlsx]

## Sheet: articles
Ref	AUTHORS	TITLE	DOI	YEAR	JOURNAL	STRENGHT OF EVIDENCE	TIME SETTING	SCOPE	SETTING	INJURY TYPE	TISSUE AFFECTED	BODY REGION	PARTICIPANTS LEVEL OF SPORT	PARTICIPANTS NUMBER	PARTICIPANTS INJURY HISTORY	SPORT	MOTOR TASK	DEVICE TYPE	DEVICE BRAND	DEVICE CHARACTERISTICS	DEVICE SAMP FREQ [samples/s]	DEVICE NUMBER OF UNITS	DEVICE POSITION	DEVICE FIXING TECHNIQUE	OTHER ASSESSMENTS	MEASUREMENT	ROLE OF IMU-BASED MEASUREMENT	ANALYSED SIGNAL	TYPE OF QUANTITY EXTRACTED	ASSESSMENT OF MEASUREMENT QUALITY	REFERENCE VALUE	CAUSAL RELATIONSHIP	IrRL
47	Winter SC, Gordon S, Brice SM, Lindsay D, Barrs S	A Multifactorial Approach to Overuse Running Injuries: A 1-Year Prospective Study	10.1080/15438627.2019.1616548	2019	Sports Health	observational	At	assessing sport-related risk of injury/ predictive factors	in field	overuse	soft-tissue and skeletal injuries	vertebral column, lower leg	trained/developmental	h: 31F, 45M of which become injuried i: 17F, 22M	injury free at time of the study	running	running	3D accelerometer	SABEL Labs	mass = 23g; full scale range = ± 16g; dimensions = 52 x 30 x 13 mm^3; resolution = 16-bit	250	1B	L5/S1 vertebrae (center of mass)	double-side adhesive foam tape, moisture-wicking fabric placed around the accelerometer secured with an elastic bandage	#	IMU: acceleration data (dynamic loading measures, dynamic postural stability) OTHER: average lap speed, participant characteristics, training history (years running, weekly distance, running frequency), previous injury history	1	acceleration	kinematics	reference to former validation	validation studies	exploring	2
71	Ghali BM, Owoeye OBA, Stilling C, Palacios-Derflingher L, Jordan M, Pasanen K, Emery CA	Internal and external workload in youth basketball players who are symptomatic and asymptomatic for patellar tendinopathy	10.2519/jospt.2020.9094	2020	Journal of Orthopaedic & Sports Physical Therapy	observational	Pre	assessing sport-related risk of injury/ predictive factors	in field	overuse	soft-tissue injuries	knee	recreationally active	h: 65M i: 14M	players were prescreened into patellar tendinopathy cases and controls without patellar tendinopathy	basketball	vertical jumps; training/competition tasks	accelerometer	Vert classic, Version 2.0, Mayfonk Athletic, Fort Lauderdale, FL, US	NS	NS	1B	anteriorly below the navel near the midline of the body	elastic waistband or clip	#	IMU: jump workload (jump count), number of basketball sessions completed (sum of the number of practice/training, game, and conditioning sessions attended by each player during the week)	1	acceleration	demographic, player load	supported procedures	vendors	building on established	1
72	Fu W, Fang Y, Shuo Liu DM, Wang L, Ren S, Liu Y	Surface effects on in-shoe plantar pressure and tibial impact during running	10.1016/j.jshs.2015.09.001	2015	Journal of Sport and Health Science	quasi-experimental	Pre	assessing sport-related risk of injury/ predictive factors	laboratory & in field	overuse	soft-tissue and skeletal injuries	lower leg	recreationally active	h: 13M	no musculoskeletal injuries of the lower extremity within the past 6 months prior to the testing	running	running	1) 2D accelerometer; 2) pressure sensor	1) Biovision Corp., Wehrheim, DE; 2) T&T Medilogic Medizintechnik GmbH, Schönefeld, Germany	1) mass = 4g; dimensions = 14 x 9 x 5 mm^3; range = ±50g; 2) #	1) 1000; 2) 300	1) 1B; 2) 2E	1) tibial tuberosity of the dominant leg; 2) shoes	1) glued; 2) in-shoe measuring system	#	PRESS: contact time, 1st and 2nd peak pressure, time to FPP and SPP, pressure–time integral, peak pressure, distribution of the five selected plantar areas during the heel-contact phase IMU: peak positive tibial acceleration	1	pressure, acceleration	kinetics, kinematics, shock	reference to former validation	validation studies	exploring	2
73	Santospagnuolo A, Boaretto D, Lalli D, Santoboni F, Nusca S, Calla B, Barchiesi F, Molinaro L, Rossi S, Vulpiani MC, Vetrano M	New predictive factors for anterior cruciate ligament injury in young female basketball players: a case report	10.23736/S0025-7826.19.03599-3	2019	Medicina Dello Sport	observational	At	assessing sport-related risk of injury/ predictive factors	laboratory	acute	soft-tissue injuries, ACL	knee	highly trained/national level	i: 1F	ACL rupture during match after one month of the first evaluation session	basketball	single leg drift jump protocol	3D accelerometer, 3D gyroscope, 3D magnetometer	GYKO, Microgate Srl, IT	mass = 35g; dimensions = 50 x 70 x 20 mm^3	1000	1B	middle back third of the leg	semi-elastic belt and a specific magnetic	The OPTOGait system (OPTOGait, Microgate S.r.l, Italy, 2010); 2 video cameras (Logitech C920 HD);	IMU: tibial sway (acceleration trajectory ellipse area, length, anterior-posterior length, middle-lateral length, speed, frequency), accerelartion root mean square MIXED: stabilization time	1	acceleration	kinematics	no		building on established	2
74	Schütte KH, Seerden S, Venter R, Vanwanseele B	Influence of outdoor running fatigue and medial tibial stress syndrome on accelerometer-based loading and stability	10.1016/j.gaitpost.2017.10.021	2018	Gait & Posture	observational	Pre	assessing sport-related risk of injury/ predictive factors	in field	overuse	skeletal injuries, tibial fracture	shank, tibia, fibula	recreationally active	h: 16 i: 14 (gender NS)	14 with a history of medial tibial stress syndrome, 16 healthy	running	running	3D accelerometer	X50-2 wireless accelerometer, Gulf Coast Data Concepts	mass = 33g; range = ± 50g; 0.016 g/count resolution	1024	2B	anteromedial aspect of the tibia(0.08 m proximal to the medial malleolus); L3–L5spinosus process of lower back	double-sided tape, and tightly fixed with extra self-adhesive tape; in a custom-designed neoprene pocket	#	IMU: peak positive acceleration, signal power magnitude, shock attenuation	1	acceleration	kinematics, shock, frequency analysis	supported procedures	tibial acceleration	building on established	3
75	Sampson JA, Murray A, Williams S, Sullivan A, Fullagar HHK	Subjective wellness, acute: Chronic workloads, and injury risk in college football	10.1519/JSC.0000000000003000	2019	Journal of Strength and Conditioning Research	observational	At	assessing sport-related risk of injury/ predictive factors	in field	acute and overuse	soft-tissue and skeletal injuries	full-body	elite/international	h: 42M	NS	american football	training and match	3D accelerometer	NS	NS	100	1B	NS	NS	GNSS	IMU: workloads (acute chronic workload ratio) OTHER: injuries (date, location, type, mechanism), subjective wellness (questionnaire with three 5-point likert scale questions on self-reported soreness, sleep, energy)	1	acceleration	player load	reference to former validation	validation studies	exploring	3
76	Senington B, Lee RY, Williams JM	Biomechanical risk factors of lower back pain in cricket fast bowlers using inertial measurement units: A prospective and retrospective investigation	10.1136/bmjsem-2020-000818	2020	BMJ Open Sport and Exercise Medicine	observational	At	assessing sport-related risk of injury/ predictive factors	in field	overuse	soft-tissue and skeletal injuries	vertebral column	trained/developmental	h: 35M	no LBP at the time of acquisition (16 hystory of LBP and 5 developed LBP)	cricket	fast bowling	a. 3D accelerometer, 3Dgyroscope, 3D magnetometer b. 3D accelerometer	a. 3AMG sensors, THETAmetrix, Portsmouth, UK; b.Hampshire+ impact accelerometer, THETAmetrix, UK	a. NS; b. NS; impact sensor range = 200g	a. 100; b.750	5B	T1;L1; S1; medial aspect of each tibia	double-sided tape+re-inforced with elastic wrap	#	IMU: spine kinematics, sacral and tibial impact characteristics	1	acceleration & angular velocity, orientation	joint/segment kinematics	no		exploring	2
77	Sasaki S, Nagano Y, Ichikawa H	Loading differences in single-leg landing in the forehand- and backhand-side courts after an overhead stroke in badminton: A novel tri-axial accelerometer research	10.1080/02640414.2018.1474535	2018	Journal of Sports Sciences	observational	Pre	understand sport-related injury mechanisms	in field	acute	soft-tissue injuries, ACL	knee	recreationally active	h: 18F	no past history of knee injury	badminton	single-leg landing	3D accelerometer	SS-WS1201, Sports Sensing, JP	mass = 41g; range = ± 16g; sampling frequency range= 1Hz ~ 1000Hz; nonlinearity= ±0.3%; noise= 300 μg ΠHz rms; cross-axis sensitivity= ±1%	100	1B	upper back	compression vest	2 digital video cameras (HDR-CX590V, Sony, Japan)	IMU: trunk acceleration CAMERA: trunk lateral inclination and hip abduction angles at the point of landing with over 4g of resultant acceleration	2	acceleration	kinematics	validation	validation studies (Player-Load™)	exploring	1
78	Peng P, Ding S, Wang Z, Zhang Y, Pan J	Acute effect of engineered thermoplastic polyurethane elastomer knockoff running footwear on foot loading and comfort during heel-to-toe running	10.1016/j.gaitpost.2020.03.010	2020	Gait & Posture	quasi-experimental	Pre	characterising protective devices	laboratory	overuse	soft-tissue and skeletal injuries	NS	recreationally active	h:15M	healthy	running	indoor running	pressure sensor	Pedar-X system, Novel GmbH, Munich, DE	NS	100	2E	insole	insole	force plates (9287C, Kistler Corporation, Switzerland)	PRESS: peak pressure and pressure time integral of seven areas FP: first vertical GRF peak, second vertical GRF peak, time to the first and second peaks, and vertical average loading rate	2	pressure	kinetics	supported procedures	vendor	building on established	2
79	Pimentel R, Potter MN, Carollo JJ, Howell DR, Sweeney EA	Peak sagittal plane spine kinematics in female gymnasts with and without a history of low back pain	10.1016/j.clinbiomech.2020.105019	2020	Clinical Biomechanics	observational	Pre	understand sport-related injury mechanisms	in field	overuse	soft-tissue and skeletal injuries	vertebral column	elite/international	h: 9F i: 6F	two groups: one with gymnasts who reported experiencing back pain within the past 12 months and those who did not	gymnastics	back walkover and back handsprings	accelerometer	Opal V2 wearable inertial sensors, APDM Inc., Portland, OR, US	NS	128	2B	waist (superficial to the L5 vertebra between the posterior superior iliac spine); chest (sternum near the manubrium)	Velcro strap and Coban Self-Adherent Wrap	video recording	IMU: spine extension and flexion, spine total range of motion (obtained as relativer orientation between two OAPL sensors located on the upper and lower spine)	1	acceleration & angular velocity, orientation	joint/segment kinematics	supported procedures	vendors	exploring	2
80	Pinheiro LSP, Ocarino JDM, Bittencourt NFN, Souza TR, Souza Martins SCD, Bomtempo RAB, Resende RA	Lower limb kinematics and hip extensors strengths are associated with performance of runners at high risk of injury during the modified Star Excursion Balance Test	10.1016/j.bjpt.2019.07.011	2020	Brazilian Journal of Physical Therapy	observational	Pre	assessing sport-related risk of injury/ predictive factors	laboratory	overuse	soft-tissue and skeletal injuries	lower leg	trained/developmental	h: 14F, 25M	healthy	running	modified Star Excursion Balance test	3D accelerometer, 3D gyroscope, 3D magnetometer	NS	range = 16 g; range = 2000deg/s; resolution = 16 bits	100	4B	interscapular sacrum; distal portion of the thigh and leg of the dominant lower limb	NS	Handheld dynamometer (microFET2; Hoggan Scientific, LLC, Salt Lake City UT, USA); 2 video cameras (Sony HDR CX405®, Tokyo, Japan; 50 Hz)	IMU: trunk and support limb hip, knee, and ankle angular displacement DYNA: isometric strength of the trunk extensors and lateral flexors muscles, and hip extensors, lateral rotators and abductors of the support limb	2	acceleration & angular velocity, orientation, force	joint/segment kinematics, kinetics	no		exploring	1
81	Preatoni E, Cazzola D, Stokes KA, England M, Trewartha G.	Pre-binding prior to full engagement improves loading conditions for front-row players in contested Rugby Union scrums.	10.1111/sms.12592	2016	Scandinavian Journal of Medicine & Science In Sports	quasi-experimental	Pre	assessing sport-related risk of injury/ predictive factors	in field	acute	soft-tissue and skeletal injuries	vertebral column	trained/developmental; highly trained/national level; elite/international	h: 432 (gender NS)	NS	rugby	scrummaging	1) 3D accelerometer, 3D gyroscope; 2) pressure sensor	1) MTw, Xsens Technologies B.V. Enschede, NL; 2) #3005E Versatek XL, Tekscan Inc., South Boston, Massachusetts, US	1) NS; 2) NS	1) sampled @ 1800; transmitted @ 50; 2) 500Hz	1) 1B; 2) 2B	1) C7 vertebra; 2) shoulder	1) secured in a plastic holder and attached; 2)fit into bespoke protective sleeves	4 cameras (HVRZ5, Sony, Tokyo, Japan; 200 and 50Hz; HDR-HC9, Sony; 50Hz)	IMU: average and maximum peak acceleration at C7 level PRESS: peak of total forces normal to the sensor surface CAMERA: timings and kinematics of the different phases	2	acceleration, pressure	kinematics	reference to former validation	validation studies	building on established	1
82	Purevsuren T, Khuyagbaatar B, Kim K, Kim YH	Investigation of Knee Joint Forces and Moments during Short-Track Speed Skating Using Wearable Motion Analysis System	10.1007/s12541-018-0125-9	2018	International Journal of Precision Engineering and Manufacturing	observational	Pre	understand sport-related injury mechanisms	in field	overuse	soft-tissue and skeletal injuries	lower leg	highly trained/national level; elite/international	h: 3F, 5M	NS	skating	short-track speed skating	1) 3D accelerometer, 3D gyroscope, 3D magnetometer; 2) pressure sensor	1) MVN, Xsens Technologies B.V. Enschede, NL; 2) Pedar-X, Novel GmbH, Munich, DE	NS	1) 100; 2) 100	1) 17B; 2) 2E	1) total body using the suit; 2) insole	1) wearable suit; 2) insole	#	IMU: knee joint kinematics IMU+PRESS: knee joint kinetics	1	orientation, pressure	joint/segment kinematics, kinetics	reference to former validation	validation studies	building on established	1
83	Fu W, Fang Y, Gu Y, Huang L, Li L, Liu Y	Shoe cushioning reduces impact and muscle activation during landings from unexpected, but not self-initiated, drops	10.1016/j.jsams.2017.03.009	2017	Journal of Science and Medicine in Sport	quasi-experimental	Pre	characterising protective devices	laboratory	acute and overuse	soft-tissue and skeletal injuries	lower leg	recreationally active	h: 12M	none of them had known musculoskeletal injuries of the lower extremity within the past six months.	basketball	bipedal landings	2D accelerometer	Biovision Corp., Wehrheim, DE	mass = 4g; dimensions = 14 × 9 × 5 mm^3	1200	1E	attached to the heel-cup of the dominant foot	glue and secured with adhesive tape	2 90 × 60 cm force plates (9287B, Kistler Corporation, Switzerland; 1200Hz); 8-camera infrared 3D motion capture system (Vicon MX,Oxford Metrics, UK)	IMU: accelerations of the shoe heel-cup MOCAP: hip and knee joint flexion/ankle joint plantarflexion angle and angular velocity at initial contact, maximum flexion angle and angular velocity after initial contact, joint flexion range of motion FP: ground reaction forces EMG: electromyography of the tibialis anterior, lateral gastrocnemius, rectus femoris, vastus lateralis, biceps femoris	2	acceleration	kinematics	supported procedures	foot acceleration	exploring	1
84	Rawashdeh SA, Rafeldt DA, Uhl TL.	Wearable IMU for Shoulder Injury Prevention in Overhead Sports	10.3390/s16111847	2016	Sensors	validation	Pre	assessing sport-related risk of injury/ predictive factors	in field	overuse	soft-tissue injuries	upper arm, elbow	NS / Insufficient data to be classified	h:11 (gender NS)	subjects were excluded from this study if they reported a history of shoulder surgery or shoulder pain in the 6 months prior to participation.	baseball & volleyball	throws and serves	3D accelerometer	Analog Devices, Norwood, MA, US	NS	50	1B	upper arm	strapped onto the upper arm	#	IMU: number of times certain motion gestures occur (throws and serves)	1	acceleration & angular velocity, orientation	demographic	no		building on established	1
85	Reenalda J, Maartens E, Buurke JH, Gruber AH	Kinematics and shock attenuation during a prolonged run on the athletic track as measured with inertial magnetic measurement units	10.1016/j.gaitpost.2018.11.020	2019	Gait & Posture	observational	Pre	understand sport-related injury mechanisms	in field	overuse	skeletal injuries, tibial fracture	shank, tibia, fibula	trained/developmental	h: 10M	free from musculoskeletal injury for at least six months prior	running	distance running	3D accelerometer, 3D gyroscope, 3D magnetometer	MTx, Xsens Technologies B.V. Enschede, NL	mass = 30g; range = ± 18g; range = ± 1200 deg/s; range = ± 750mGauss	100	8B	top of both feet; medio-anterior part of the tibia upper legs lateral at the iliotibial tract; sacrum; sternum (the manubrium)	lycra suit	#	IMU: temporal parameters (stance and stride duration), peak sacral and tibial accelerations, shock attenuation (1 - peak sacral acceleration / peak tibial acceleration),hip and knee sagittal angles	1	acceleration	temporal, kinematics, joint/segment kinematics, shock	reference to former validation	validation studies	building on established	2
86	Remus A, Caulfield B, Doherty C, Crowe C, Severini G, Delahunt E	A laboratory captured "giving way" episode in an individual with chronic ankle instability	10.1016/j.jbiomech.2018.05.015	2018	Journal of Biomechanics	observational	Pre	understand sport-related injury mechanisms	in field	acute	soft-tissue injuries, ankle sprain	ankle	NS / Insufficient data to be classified	i: 1M	bilateral CAI	performance tests	Change of direction and acceleration test, agility T-Test, drop vertical jump	3D accelerometer	Shimmer Research, Dublin, IE	range = ±16 g; range = ±2000deg/s	256	5B	dorsum foot; 20cm proximal to lateral malleolus on the flat segment of the shaft of the tibia; L4 vertebra	under participant's shoelaces; elastic adhesive bandage; with straps	2 cameras (Sony HDR-A15; 120 Hz)	IMU: linear acceleration, rotational velocities CAMERA: phase detection, qualitative analysis of videos	1	acceleration & angular velocity	kinematics	no		very exploring	2
87	Milner CE, Hawkins JL, Aubol KG	Tibial Acceleration during Running Is Higher in Field Testing Than Indoor Testing.	10.1249/MSS.0000000000002261	2020	Medicine & Science in Sports & Exercise	observational	Pre	assessing sport-related risk of injury/ predictive factors	laboratory & in field	overuse	skeletal injuries, tibial fracture	shank, tibia, fibula	recreationally active	h: 10F, 9M	healthy	running	treadmill and outdoor running	accelerometer	PCB Piezotronics Inc., Depew, NY, US	Model 356A45	NS	1B	vertically aligned on the distal tibia	mounted firmly to a thermoplastic base and attached via double-sided skin safe tape and tightly overwrapped with self-adherent wrap	8 TVC motion capture system (Vicon T40S, Oxford, UK; 200 Hz); force platform (AMTI, Inc., Watertown, MA; 1000Hz); Visual3D software (C-Motion, Germantown, MD); GNSS watch with heart rate monitor (Garmin 735XT, Olathe, KS);	IMU: peak positive axial and peak resultant tibial acceleration, peak medial, peak lateral, peak anterior, and peak posterior acceleration angles of inclination of the peak resultant vector percent stride to peaks	1	acceleration	kinematics, shock	supported procedures	tibial acceleration	building on established	2
88	Mizrahi J, Verbitsky O, Isakov E, Daily D	Effect of fatigue on leg kinematics and impact acceleration in long distance running	10.1016/S0167-9457(00)00013-0	2000	Human Movement Science	observational	Pre	assessing sport-related risk of injury/ predictive factors	in field	overuse	soft-tissue and skeletal injuries	lower leg	NS / Insufficient data to be classified	h: 14M	healthy	running	treadmill running	accelerometer	Kistler PiezoBeam, type 8634B50, Kistler, Winterthur, CH	mass = 4.2g	1667	1B	tibial tuberosity	elastic belt	#	IMU: impact acceleration on the shank, stride rate CAMERA: knee flexion angle, hip vertical excursion	2	acceleration	temporal, kinematics, shock	supported procedures	tibial acceleration	building on established	2
89	Milner CE, Ferber R, Pollard CD, Hamill J, Davis IS	Biomechanical Factors Associated with Tibial Stress Fracture in Female Runners	10.1249/01.mss.0000183477.75808.92	2006	Medicine & Science in Sports & Exercise	observational	Pre	assessing sport-related risk of injury/ predictive factors	laboratory	overuse	skeletal injuries, tibial fracture	shank, tibia, fibula	trained/developmental	h: 20 i: 20 (gender NS)	history of tibial stress fracture	running	running	1D accelerometer	PCB Piezotronics Inc., Depew, NY, US	mass = 3.28 g; range ± 500 g; mounted resonant frequency > 70 g	960	1B	distal anteromedial tibia	protected in a custom machined aluminiul casing and mounted on a piece of lightweight thermoplastic material	6 TVC motion capture system (Vicon 512, Oxford Metrics, Oxford, UK; 120Hz); force platform (Bertec Corporation, Columbus, OH; 960 Hz)	IMU: peak tibial shock FP: vertical impact peak, instantaneous and average vertical loading rates during braking MOCAP: knee flexion range of motion MIXED: ankle and knee joint stiffness	2	acceleration	kinematics, shock, frequency analysis	supported procedures	tibial acceleration	exploring	1
90	Mizrahi J, Verbitsky O, Isakov E,	Fatigue-related loading imbalance on the shank in running: a possible factor in stress fractures.	10.1114/1.284	2000	Annals of Biomedical Engineering	observational	Pre	assessing sport-related risk of injury/ predictive factors	laboratory	overuse	skeletal injuries, tibial fracture	shank, tibia, fibula	recreationally active	h: 14M	healthy	running	treadmill running	3D accelerometer	Kistler Piezo-Beam, type 8634B50, Kistler, Winterthur, CH	mass= 4.2g	1667	1B	tibial tuberosity of the right leg	elastic belt	SensorMedics 4400 metabolic cart for respiratory data (Alpha Technologies, Inc., Laguna Hills, CA); NV-M3000EN Panasonic camera (50 frames/second); Eight channel surface electrode system (Atlas Research Ltd., 1667 Hz)	IMU: shank impact acceleration, tibia acceleration power spectral density, stride rate CAMERA: knee angles and hip height EMG: tibialis anterior and gastrocnemius muscles activity OTHER: end-tidal carbon dioxide pressure, anaerobic threshold	2	acceleration	kinematics, shock, frequency analysis	supported procedures	tibial acceleration	building on established	2
91	Moran KA, Marshall BM	Effect of Fatigue on Tibial Impact Accelerations and Knee Kinematics in Drop Jump	10.1249/01.mss.0000229567.09661.20	2006	Medicine & Science in Sports & Exercise	observational	Pre	assessing sport-related risk of injury/ predictive factors	laboratory	overuse	soft-tissue and skeletal injuries	lower leg	recreationally active	h: 15M	no history of lower-extremity injury; no abnormal resting electrocardiogram or blood pressure	jump tests	plyometric drop-jump	1D accelerometer	ADXL78, Analog Devices, IE	mass = 17 g;; range ± 50 g; sensitivity = 38 mV/g	1000	1B	proximal anterior–medial aspect of tibia	double-sided tape and prewrap (3M Duraporei, UK)	electrogoniometer (XM110, Biometrics Ltd, UK; 1000 Hz); foot–switch apparatus (TF100, Biometrics Ltd, UK; 1000 Hz)	IMU: peak impact acceleration OTHER: knee angle at initial touch-down, knee flexion angle (maximum), knee flexion range of motion, knee peak angular velocity	2	acceleration	kinematics, shock, frequency analysis	supported procedures	tibial acceleration	building on established	2
92	Moore IS, Jones A, Dixon S	The pursuit of improved running performance: Can changes in cushioning and somatosensory feedback influence running economy and injury risk?	10.1080/19424280.2013.873487	2014	Footwear Science	quasi-experimental	Pre	characterising protective devices	laboratory	overuse	soft-tissue and skeletal injuries	lower leg	trained/developmental	h:15F	free from injury for at least three months prior to testing	running	running	accelerometer	Trigno Wireless EMG, Delsys, Boston, MA, US	NS	148	1B	attached to the heel between the calcaneous markers	NS	Automated gas analysis system (Cortex Metalyzer II; Cortex Biophysik, Leipzig, Germany); 8TVC motion capture system (Vicon Peak; 120 Hz); electromyography	MOCAP: lower limb kinematics IMU: heel impact acceleration EMG: rectus femoris, vastus lateralis, biceps femoris, gastrocnemius medialis, gastrocnemius lateralis and tibialis anterior muscle activity OTHER: oxigen comsumption	3	acceleration	kinematics, shock	no		exploring	1
93	Ogon M, Aleksiev AR, Spratt KF, Pope MH, Saltzman CL	Footwear Affects the Behavior of Low Back Muscles when Jogging	10.1055/s-2001-16240	2001	International Journal of Sports Medicine	quasi-experimental	Pre	characterising protective devices	laboratory	overuse	soft-tissue and skeletal injuries	lower leg	NS / Insufficient data to be classified	h: 5F, 7M	NS	running	running	1D accelerometer	Isoton, Endevco, San Juan Capistrano, CA, US	model = 2250A-10	NS	1B	L3 spinal process	double-sided adhesive tape	force plate (Type 4060A, Bertec Corporation,Worthington, OH, USA)	IMU: rate of shock transmission to the spine (L3 acceleration rate = acceleration amplitude / time to acceleration peak) MIXED: muscle onset latency, latency from acceleration peak to muscle maximum response	2	acceleration	kinematics, shock	supported procedures	tibial acceleration	building on established	2
94	Dowling B, McNally MP, Laughlin WA, Onate JA	Changes in Throwing Arm Mechanics at Increased Throwing Distances During Structured Long-Toss	10.1177/0363546518795892	2018	The American Journal of Sports Medicine	observational	Pre	assessing sport-related risk of injury/ predictive factors	in field	overuse	soft-tissue injuries	upper arm, elbow	recreationally active	h: 95 (gender NS)	no current significant injury; healthy: able to perform at 100% capability	baseball	throwing	3D accelerometer, 3D gyroscope	motusBASEBALL	NS	NS	1B	on the medial aspect of the ulna 5 cm (approx- imately 2 finger widths) below the medial epicondyle of the humerus	sleeve	#	IMU: elbow torque, arm rotational velocity, shoulder external rotation, arm slot	1	acceleration & angular velocity, orientation	kinematics, joint/segment kinematics, kinematics	validation	gold standard = stereophotogrammetry	building on established	1
95	Olin ED, Gutierrez GM	EMG and tibial shock upon the first attempt at barefoot running	10.1016/j.humov.2012.11.005	2013	Human Movement Science	observational	Pre	understand sport-related injury mechanisms	laboratory	overuse	skeletal injuries, tibial fracture	shank, tibia, fibula	recreationally active	h: 12F, 6M	NS	running	running	3D accelerometer	Type 8690C5, Kistler Instrument Corp., Amherst, NY, US	NS	1000	1B	tibial crest	NS	bipolar surface electrodes; foot switches; electrogoniometer	IMU: peak shock, time to peak shock (from touchdown to peak) average shock over the stance phase EMG: tibialis anterior and medial gastrocnemius muscle activity OTHER: knee flexion angle, foot strike events	2	acceleration	kinematics, shock	no		exploring	2
96	Mahar AT, Derrick TR, Hamill J, Caldwell GE	Impact Shock and attenuation during in-line skating	#	1997	Medicine & Science in Sports & Exercise	observational	Pre	assessing sport-related risk of injury/ predictive factors	laboratory	overuse	soft-tissue and skeletal injuries	lower leg	trained/developmental	h: 7F, 4M	NS	skating	treadmill running and in-line skating	1D accelerometer	PCB Piezotronics Inc., Depew, NY, US	mass = 1.7 g; frequency range = 0.35 Hz ~ 30 kHz; resonant frequency > 70 kHz; resolution = 0.01 g; model = 353B17	1000	2B	anteromedial side of the distal portion of the tibia; forehead	attached to small (2.1-g) aluminum mounting brackets and tighetened (to the limit of subject tolerance) using elastic strapping	#	IMU: tibia and head peak acceleration, tibia and head acceleration peak frequency, tibia and head acceleration median frequency, impact attenuation between tibia and head	1	acceleration	kinematics, shock, frequency analysis	pilot validation	pilot	building on established	2
97	Martínez-Gramage J, Albiach JP, Moltó IN, Amer-Cuenca JJ, Moreno VH, Segura-Ortí E	A random forest machine learning framework to reduce running injuries in young triathletes	10.3390/s20216388	2020	Academic Open Access Publishing	observational	At	assessing sport-related risk of injury/ predictive factors & gait Retraining	laboratory	overuse	soft-tissue and skeletal injuries	lower leg	highly trained/national level	h: 9F, 10M	healthy	running	treadmill running	3D accelerometer, 3D gyroscope, 3D magnetometer	G-Sensor, BTS Bioengineering, Garbagnate, IT	NS	NS	1B	S1	with a belt	Camera; Apple iPad Air tablet computer (Apple Inc, Cupertino, CA); GSensor; FREEEMG 1000 and EMG Analyzer (BTS Bioengineering, Milan, Italy)	OTHER: oxygen consumption (VO2) IMU: 3D pelvis kinematics (pelvic obliquity for the left and right leg, pelvic tilt, and pelvic rotation) EMG: gluteus medium muscle activity	2	acceleration & angular velocity, orientation	joint/segment kinematics	no		exploring	2
98	McLellan CP, Lovell DI	Neuromuscular responses to impact and collision during elite rugby league match play.	10.1519/JSC.0b013e318231a627	2012	Journal of Strength and Conditioning Research	observational	Pre	assessing sport-related risk of injury/ predictive factors	laboratory & in field	acute	soft-tissue and skeletal injuries	full-body	highly trained/national level	h: 22M	NS	rugby	impacts and collisions	3D accelerometer	SPI-Pro GPS with integrated accelerometer, GPSports	mass = 76g; dimensions= 48 x 320 x 387 mm^3	NS	1B	center area of the upper back slightly superior to the shoulder blades at the level of approximately T1	in a padded mini backpack secured by a purpose-designed vest	GNSS (5 Hz) electronic light gates (Smartspeed, Fusion Sports, Brisbane, Australia) Force plate for CMJ analysis in lab	IMU: intensity, number, and distribution of impact forces experienced by players FP: peak rate of force development, peak power, peak force during a countermovement jump (24h pre-match, 30min pre-match, 30 post-match, 24h-intervals for 5 days post-match)	2	acceleration	kinematics, demographic	validation	gold standard = electronic light gates	building on established	1
99	Meardon SA, Hamill J, Derrick TR	Running injury and stride time variability over a prolonged run	10.1016/j.gaitpost.2010.09.020	2011	Gait & Posture	observational	Pre	assessing sport-related risk of injury/ predictive factors	in field	overuse	soft-tissue and skeletal injuries	lower leg	recreationally active	h:9 i:9 (gender NS but matched in groups)	previous running related injury in lower extremities	running	distance running	1D accelerometer	ADXL250, Analog Devices, Norwood, MA, US	mass (data logger, BioRecorder BM4 Biomedical Monitoring Ltd., Glascow, Scotland)= 82g; range = 50g; frequency= 1000 Hz	1000	1B	distal anteromedial tibia (alined with the longitudinal axis of the tibia)	circumferentially wrapped elastic strap and Coban (Johnson & Johnson, Arlington, TX)	PolarRS200SD running computer and footpod (Polar Electro Inc., Kempele, Finland) (to ensure that subjects maintained a consistent speed)	IMU: stride times and their long-range correlations (using detrended fluctuation analysis)	1	acceleration	temporal	supported procedures	tibial acceleration	exploring	1
100	Mehta S	Relationship between workload and throwing injury in varsity baseball players	10.1016/j.ptsp.2019.08.001	2019	Physical Therapy in Sport	observational	At	assessing sport-related risk of injury/ predictive factors	in field	overuse	soft-tissue injuries	upper arm, elbow	trained/developmental	h: 18M	uninjured	baseball	baseball tasks	3D accelerometer, 3D gyroscope	MotusTHROW™,Motus, New York, NY, US	NS	NS	1B	near the elbow	sleeve	#	IMU: arm slot, arm angular speed, maximum shoulder external rotation, peak elbow valgus torque	1	acceleration & angular velocity, orientation	kinematics, joint/segment kinematics, kinetics	reference to former validation	validation studies	exploring	3
101	McNair PJ, Marshall RN	Kinematic and kinetic parameters associated with running in different shoes	10.1136/bjsm.28.4.256	1994	British Journal of Sports Medicine	quasi-experimental	Pre	characterising protective devices	laboratory	overuse	NS	NS	trained/developmental	NS: 10M	NS	running	jogging	1D accelerometer	PC9367/20, Phillips, Nijgmegan, NL	mass = 20g	1000	1B	lower medial aspect of the tibia aligned with the longitudinal axis of the tibia	i) wrapping double sided adhesive tape around the lower tibia; ii) Zinc oxide tape then wrapped around the tibia over the accelerometer as firmly as possible without causing the subject undue discomfort	motion capture system (Motion Analysis Flextrack system, Motion Analysis Corp., Santa Rosa, California, USA)	IMU: peak acceleration, time to peak acceleration MOCAP: knee and ankle angles	2	acceleration	temporal, kinematics	supported procedures	tibial acceleration	building on established	2
102	Meyer C, Mohr M, Falbriard M, Nigg SR, Nigg BM	Influence of footwear comfort on the variability of running kinematics	10.1080/19424280.2017.1388296	2018	Footwear Science	quasi-experimental	Pre	characterising protective devices	in field	overuse	soft-tissue and skeletal injuries	lower leg	recreationally active	h: 18F, 18M	no lower extremity injuries in the last three months	running	running	3D accelerometer, 3D gyroscope	adidas Run-Genie	NS	250	1B	dorsum of the foot	clipped to the laces of the shoe and further fixed with tape	timing lights; force plate	IMU: temporal parameters (heel strike event), variability of acceleration and angula velocity curves	1	acceleration & angular velocity	temporal, kinematics	validation	gold standard = force platform	building on established	1
103	Milner CE, Hamill J, Davis I	Are knee mechanics during early stance related to tibial stress fracture in runners?	10.1016/j.clinbiomech.2007.03.003	2007	Clinical Biomechanics	observational	Pre	assessing sport-related risk of injury/ predictive factors	laboratory	overuse	skeletal injuries, tibial fracture	shank, tibia, fibula	trained/developmental	h: 23 i: 23 (gender NS)	previously sustaining tibial stress fractures	running	overground running	accelerometer	PCB Piezotronics Inc., Depew, NY, USA	NS	960	1B	antero-medially distal tibia	NS	6 TVC motion capture system (Vicon 512 system, Oxford Metrics, Oxford, UK); Visual 3D	IMU: peak tibial acceleration MOCAP: knee flexion excursion (RoM), knee angle at footstrike, shank angle at footstrike FP: knee stiffness, knee flex-ext moment	2	acceleration	kinematics, shock	supported procedures	tibial acceleration	building on established	1
104	Li RT, Salata MJ, Rambhia S, Sheehan J, Voos JE	Does Overexertion Correlate With Increased Injury? The Relationship Between Player Workload and Soft Tissue Injury in Professional American Football Players Using Wearable Technology	10.1177/1941738119868477	2019	Sports Health	observational	At	assessing sport-related risk of injury/ predictive factors	in field	acute and overuse	soft-tissue injuries	full-body	highly trained/national level	h: 115M (2014-2015); 117M (2015-2016)	NS	american Football	american Football tasks	3D accelerometer	Catapult OptimEye, Catapult Sports, AU	NS	100	1B	betweeen the scapulae	custom harness	GNSS	IMU: player load	1	acceleration	player load	reference to former validation	validation studies (Player-Load™)	exploring	2
105	Gabbett T, Jenkins D, Abernethy B	Physical collisions and injury during professional rugby league skills training	10.1016/j.jsams.2010.03.007	2010	Journal of Science and Medicine in Sport	observational	Pre	assessing sport-related risk of injury/ predictive factors	in field	acute	soft-tissue and skeletal injuries	full-body	highly trained/national level	h: 30M		rugby	physical collisions	a. 3D accelerometer b. 3D gyroscope	Minimax X, Catapult, AU	NS	100	1B	on the upper back	in a small vest	GNSS (5 Hz), video (details NS)	IMU: player load peaks (3D jerk), number and intensity of collisions	1	acceleration	demographic, player load	validation	gold standard = human\software classification	exploring	1
106	Lizzio VA, Smith DG, Jildeh TR, Gulledge CM, Swantek AJ, Stephens JP, Schulz BM, Makhni EC	Importance of radar gun inclusion during return-to-throwing rehabilitation following ulnar collateral ligament reconstruction in baseball pitchers: a simulation study	10.1016/j.jse.2019.08.014	2020	Journal of Shoulder and Elbow Surgery	validation	Post	post injury monitoring or return to play assessment	laboratory & in field	acute	soft-tissue injuries	upper arm, elbow	trained/developmental	h: 37M	participants were excluded if they were injured, recovering from injury, or otherwise not currently pitching at full effort	baseball	pitch	accelerometer, gyroscope	Motus Global, Rockville Centre, NY, US	NS	NS	1B	arm	arm sleeve	#	OTHER: demographic information, injury history, dimensions of dominant arm IMU: medial elbow torque, arm speed, shoulder rotation, arm slot pitch velocity, pitch kynematics	1	acceleration & angular velocity, orientation	joint/segment kinematics, kinetics	reference to former validation	validation studies	building on established	3
107	Lizzio VA, Gulledge CM, Smith DG, Meldau JE, Borowsky PA, Moutzouros V, Makhni EC	Predictors of elbow torque among professional baseball pitchers	10.1016/j.jse.2019.07.037	2020	Journal of Shoulder and Elbow Surgery	observational	Pre	assessing sport-related risk of injury/ predictive factors	in field	acute and overuse	soft-tissue injuries	upper arm, elbow	highly trained/national level	h: 12M	players were excluded if they were not primarily pitchers, if they were not currently participating in competitive play, or if they did not feel that they could pitch with 100% effort	baseball	pitch	accelerometer, gyroscope	Motus Global, Rockville Centre, NY, USA	NS	NS	1B	1.5 inches distal to the medial epicondyle	compression athletic sleeve	#	OTHER: height, weight, body mass index, upper, forearm, total arm length, elbow joint circumference IMU: elbow torque, arm slot, arm speed, shoulder rotation, ball velocity	1	acceleration & angular velocity, orientation	kinematics, joint/segment kinematics	validation	gold standard = high-speed motion analysis	exploring	1
108	Lo Martire R, Gladh K, Westman A, Lindholm P, Nilsson J, Äng OB	Neck muscle activity in skydivers during parachute opening shock	10.1111/sms.12428	2016	Scandinavian Journal of Medicine & Science in Sports	observational	Pre	assessing sport-related risk of injury/ predictive factors	laboratory & in field	acute	skeletal injuries	vertebral column	NS / Insufficient data to be classified	h: 5F,15M	No ongoing neck problems	skydiving	parachuting	3D accelerometer	Mega Electronics Ltd, Kuopio, FI	NS	NS	2B	between spinal processes T1-T; right shoulder strap of the rig	in a specific bag; between two layers of elastic suit	Biomonitor ME6000 (Mega MuscleTester, Mega Electronics Ltd, Kuopio, Finland); Videocamera (GoPro, Hero 2, HD 2–14, Woodman Labs, San Francisco, California, USA); barometric altimeter (Altimaster Neptune III v6.0.2, DeLand)	IMU: 3D accelaration, parachute opening shock onset, parachute opening shock offset EMG: anterior neck, upper and lower posterior neck, and upper shoulders muscle activity	3	acceleration	temporal, kinematics	supported procedures	tibial acceleration	exploring	1
109	Lucas-Cuevas AG, Camacho-Garcìa A, Llinares R, Quesada JIP, Llana-Belloch S, Perez-Soriano P	Influence of custom-made and prefabricated insoles before and after an intense run	10.1371/journal.pone.0173179	2017	Plos One	quasi-experimental	Pre	assessing sport-related risk of injury/ predictive factors	laboratory	overuse	soft-tissue and skeletal injuries	lower leg	recreationally active	h: 18F, 20M	no injuries in the last year, no previous lower-limb surgery in the last 3 years	running	treadmill running	3D accelerometer	Sportmetrics, ES	mass = 2.5 g; dimensions = 40 × 22 × 12 mm^3	500	2B	proximal anteromedial aspect of the tibia; forehead	double-sided adhesive tape and secured via elastic belts	#	IMU: stride length, stride rate, peak head and tibial acceleration, shock magnitude, acceleration rate, shock attenuation	1	acceleration	temporal, kinematics, shock	supported procedures	tibial acceleration	building on established	2
110	Lucas-Cuevas ÁG, Encarnacion Martinez A, Camacho García A, Llana Belloch S, Pérez Soriano P	The location of the tibial accelerometer does influence impact acceleration parameters during running	10.1080/02640414.2016.1235792	2016	Journal of Sports Sciences	quasi-experimental	Pre	assessing sport-related risk of injury/ predictive factors	laboratory	overuse	soft-tissue and skeletal injuries	vertebral column, lower leg	NS / Insufficient data to be classified	h: 30M	no history of lower extremity injuries within the last year	running	treadmill running	3D accelerometer	AcelSystem, ES	NS	500	3B	forehead; antero-medial aspect of the tibia; distal end of the tibia	NS	#	IMU: peak acceleration, shock attenuation peak frequency, peak power, signal magnitude in both the low and high frequency range	1	acceleration	kinematics, shock, frequency analysis	no		building on established	2
111	Macdermid PW, Fink PW, Stannard RS	The Effects of Vibrations Experienced during Road vs. Off-road Cycling	10.1055/s-0034-1398534	2015	International Journal of Sports Medicine	quasi-experimental	Pre	assessing sport-related risk of injury/ predictive factors	laboratory & in field	overuse	soft-tissue injuries	head, vertebral column	highly trained/national level	h: 7 (gender NS)	NS	cycling	road climb and single-track climb	3D accelerometer, 3D gyroscope, 3D magnetometer	Emerald, APDM, OR, US	NS	128	3B; 2E	lower left arm (frontal distal position); left lower leg (frontal, distal position); seat post (within 10 cm of saddle-rider contact area); lumbar region of lower back; and medial forehead	NS	Quark CinQo powermeter (reported accuracy ± 1.5 %); GNSS device	IMU: acceleration root mean square OTHER: speed, power output, cadence, oxygen consumption (VO2), heart rate	2	acceleration	kinematics	reference to former validation	validation studies ISO	building on established	2
112	Macdermid PW, Miller MC, Macdermid FM, Fink PW	Tyre volume and pressure effects on impact attenuation during mountain bike riding	10.1155/2015/191075	2015	Shock and Vibration	quasi-experimental	Pre	characterising protective devices	in field	overuse	soft-tissue and skeletal injuries	head, vertebral column	highly trained/national level	h: 12 (gender NS)	NS	cycling	Downhill biking	3D accelerometer, 3D gyroscope, 3D magnetometer	Emerald, APDM, OR, US	NS	128	3B; 2E	lower arm (frontal distal posi-tion); lower leg (frontal, distal position); seat post (within 10 cm of the saddle-rider contact area); lumbar region of the lower back; medial forehead	NS	#	IMU: maximum frequency, maximum magnitude, 3D acceleration, amount of vibration = root mean square of the acceleration	1	acceleration	kinematics, frequency analysis, vibration	no		exploring	1
113	Jorgensen U	Body load in heel-strike running: The effect of a firm heel counter	10.1177/036354659001800211	1990	The American Journal of Sports Medicine	quasi-experimental	Pre	assessing sport-related risk of injury/ predictive factors	laboratory	overuse	soft-tissue and skeletal injuries	lower leg	recreationally active	h: 5F, 6M	healthy	running	treadmill running	accelerometer	NS	NS	NS	1B	below the tibial tuberosity	NS	Jaeger Ergo-Oxyscreen gas analyser (art. no. 780053, version 04.84, Hoechberg, Germany), electromyography (Medicotest QTY 25, Denmark)	IMU: g-force EMG: quadriceps, hamstrings, tibialis anterior, and triceps surae muscle activity OTHER: VO2	2	acceleration	kinetics	no		building on established	1
114	Kim KJ, Gailey R, Agrawal V, Gaunaurd I, Feigenbaum L, Bennett C, Felt V, Best TM	Quantification of Agility Testing with Inertial Sensors after a Knee Injury	10.1249/MSS.0000000000002090	2020	Medicine & Science in Sports & Exercise	validation	Post	post injury monitoring or return to play assessment	in field	acute	soft-tissue injuries, ACL	knee	h. recreationally active i. elite/international	h: 10F, 10M i: 3F, 12M	knee ligament injury (ACL, MCL)	performance tests	side step test	3D accelerometer, 3D gyroscope	CaneSense™	NS	50	3B	medial tibial flare (a flat surface on the anteromedial aspect of the knee just above the tibial tubercle); pelvis	two elastic knee sleeves with elastic bands; an elastic belt (pelvis)	#	IMU: Transitional Angular Displacement of Segment, symmetry index of Transitional Angular Displacement of Segment	1	acceleration & angular velocity, orientation	joint/segment kinematics	reference to former validation	validation studies	building on established	1
115	Klous M, Muller E, Schwameder H	Three-dimensional lower extremity joint loading in a carved Ski and snowboard turn: A pilot study	10.1155/2014/340272	2014	Computational and Mathematical Methods in Medicine	observational	Pre	assessing sport-related risk of injury/ predictive factors	in field	acute	soft-tissue and skeletal injuries	lower leg	highly trained/national level	h: 5M	no history of injuries	skiing and snowboarding	carved turn	force transducer	Kistler, Winterthur, CH	mobile force plate	200	2E	ski, snowboard	NS	5 cameras (Panasonic, F15, 50 Hz), theodolite for camera positioning, 100 markers approximately	MIXED (video cameras+dynamometers): ankle and knee joint forces and moments at the steering leg CAMERA: skidding angle	2	force	kinetics	reference to former validation	validation studies	building on established	1
116	Dufek JS, Mercer JA, Teramoto K, Mangus BC, Freedman JA	Impact Attenuation and Variability During Running in Females: A Lifespan Investigation	#	2008	Journal of Sport Rehabilitation	quasi-experimental	Pre	assessing sport-related risk of injury/ predictive factors	laboratory	overuse	soft-tissue and skeletal injuries	vertebral column, lower leg	NS / Insufficient data to be classified	h: 31F	healthy	running	treadmill running	1D accelerometer	Model 352C68, PCB Piezotronics Inc., Depew, NY, US	NS	1000	3B	distal aspect of the tibia; low back at approximately L5; frontal aspect of the forehead	stretchable bandage tape, belt, plastic headband	#	IMU: peak tibial impact acceleration, peak back impact acceleration, peak head impact acceleration	1	acceleration	kinematics, shock	supported procedures	tibial acceleration	building on established	2
117	Kiernan D, Hawkins DA, Manoukian MAC, McKallip M, Oelsner L, Caskey CF, and Coolbaugh CL	Accelerometer-based prediction of running injury in National Collegiate Athletic Association track athletes	10.1016/j.jbiomech.2018.04.001	2018	Journal of Biomechanics	observational	At	assessing sport-related risk of injury/ predictive factors	in field	overuse	soft-tissue and skeletal injuries	lower leg	elite/international	h: 6 i: 3 (gender NS)	Participants were separated into injured (missed training due to self-reported RRI) and uninjured (no missed training due to RRI) groups.	running	running	3D accelerometer	ADXL345, Analog Devices, Norwood, MA, US	mass= ± 8g	48.4–52.4	1B	lateral right iliac crest	neoprene belt	#	IMU: peak vertical ground reaction force, number of strides, weighted cumulative loading pain/fatigue (sum of peak vertical ground reaciton force weighted to the 9th power)	1	acceleration	temporal, kinematics	no		building on established	1
118	Lahti J, Mendiguchia J, Ahtiainen J, Anula L, Kononen T, Kujala M, Matinlauri A, Peltonen V, Thibault M, Toivonen RM, Edouard P, Morin JB	Multifactorial individualised programme for hamstring muscle injury risk reduction in professional football: Protocol for a prospective cohort study	10.1136/bmjsem-2020- 000758	2020	BMJ Open Sport and Exercise Medicine	validation	At	assessing sport-related risk of injury/ predictive factors	in field	acute	soft-tissue injuries	thigh, femur	elite/international	h: 214M	NS	soccer	soccer tasks	gyroscope	Let- Sense Group, Castel Maggiore, IT	NS	NS	1B	S1/L5 junction	NS	Dynamometer; digital goniometer app (Goniometer Records, Indian Orthopedic Research Group); radar device (Stalker ATS Pro II, Applied Concepts, TX, USA); high-speed camera	IMU: pelvic kinematics OTHER: lumbo-pelvic control, ROM and strength assessment	3	acceleration & angular velocity, orientation	joint/segment kinematics	reference to former validation	validation studies	building on established	2
119	Knudson D, Blackwell J	Upper extremity angular kinematics of the one-handed backhand drive in tennis players with and without tennis elbow.	10.1055/s-2007-972599	1997	International Journal of Sports Medicine	observational	Pre	assessing sport-related risk of injury/ predictive factors	in field	overuse	soft-tissue injuries	upper arm, elbow	trained/developmental; highly trained/national level	h: 11M i: 5M	healthy or with history of Tennis Elbow	tennis	one-hand back-hand drive	3D accelerometer	Dytran (3016A), CA, US	NS	1000	1E	throat of the racket	bolted	electrogoniometer; strain gauge in the racket	IMU: accelerations, impulse during impact OTHER: joint angular positions	2	acceleration	kinematics, kinetics	no		building on established	1
120	Hong Y, Wang SJ, Lam WK, Cheung JT-M	Kinetics of badminton lunges in four directions	10.1123/jab.2012-0151	2014	Journal of Applied Biomechanics	observational	Pre	assessing sport-related risk of injury/ predictive factors	laboratory	acute and overuse	soft-tissue and skeletal injuries	lower leg	trained/developmental	h: 15M	all participants reported they were free from neuromuscular, vestibular, and vision system injuries for at least six months before participation, and were generally in good physical condition.	badminton	lunge maneuvers in four directions, namely, right-forward, left-forward, right-backward, and left-backward	pressure sensor	Pedar-X system, Novel GmbH, Munich, DE	99 capacitive pressure sensors	200	2E	in shoes	insole	video cameras (DEWEsoft 6.5, DEWETRON Ges.m.b.H., Austria; 100 Hz, shutter speed of 1/500 s); force plate (Kistler 9281C, Switzerland)	PRESS: plantar pressure variables CAMERA: landing angle FP: ground reaction forces	2	pressure	kinetics	no		exploring	1
121	Lapinski M, Medeiros CB, Scarborough DM, Berkson E, Gill TJ, Kepple T, Paradiso JA	A wide-range,wireless wearable inertial motion sensing system for capturing fast athletic biomechanics in overhead pitching	10.3390/s19173637	2019	Sensors	validation	Pre	assessing sport-related risk of injury/ predictive factors	laboratory	overuse	soft-tissue injuries	upper arm, elbow	NS / Insufficient data to be classified	a&b. h: 2M c. h: 6M	NS	baseball	strikes	3D accelerometer, 3D gyroscope, 3D magnetometer	ADXL377, ADRXS649; Invensense IMU-3000	mass = 25g; dimensions = 45 x 50 x 10 mm^3; range = ± 200g, ± 16g; range = ± 20000deg/s,± 1000deg/s	1000	5B	wrist; forearm; upper arm; chest; waist	rubberized Neoprene SnakeskinTM straps with snug pockets	Professional grade radar gun, Stalker ATS 5.0 (Stalker Radar, Plano, TX, USA); 20 T-series camer,a Vicon MXTM 3D motion capture system (Vicon Motion Systems Ltd., Oxford, Oxfordshire, UK; 360 Hz)	IMU: average throw speed, average peak elbow valgus force, average peak shoulder distractive force, average jerk value per pitch type	1	acceleration & angular velocity, orientation	kinematics, joint/segment kinematics, kinetics	validation	gold standard = Visual3DTM (v5)	building on established	1
122	Hong H, Han L, Liao Y, Hu C, Chang L	Nonlinear Dynamic Model of Basic Tennis Actions	10.1007/s42417-019-00147-8	2019	Journal of Vibrational Engineering and Technologies	observational	Pre	assessing sport-related risk of injury/ predictive factors	laboratory	overuse	soft-tissue injuries	upper arm, elbow	NS / Insufficient data to be classified	h: 1M	NS	tennis	passive tasks	3D accelerometer, 3D gyroscope	MotusTHROW™, Motus, New York, NY, US	NS	NS	1B	near the elbow	sleeve	#	IMU: shoulder angles, racket-handle angle, vibration amplitude and frequency from angle-time waveform MODEL: impact force, impact location, hand grip position, string tension	3	acceleration & angular velocity, orientation	kinematics, joint/segment kinematics, vibration	no		building on established	2
123	Jarning JM, Mok K-M, Hansen BH, Bahr R	Application of a tri-axial accelerometer to estimate jump frequency in volleyball	10.1080/14763141.2015.1027950	2015	Sports Biomechanics	validation	Pre	assessing sport-related risk of injury/ predictive factors	in field	overuse	soft-tissue injuries	knee	elite/international	h: 12M	NS	volleyball	volleyball tasks	3D accelerometer	ActiGraphTM Inc., Pensacola, FL, US; Analog Devices, Norwood, MA, US	range = ± 6 g; capacitive MEMS	100	1B	anterior superior iliac spine (midline of the lumbosacral region)	adjustable cotton fabric belt, strapped around the waist	2 digital video cameras	IMU: peak vertical acceleration, peak resultant acceleration	1	acceleration	kinematics, shock	no		exploring	1
124	Johnson CD, Outerleys J, Jamison ST, Tenforde AS, Ruder M, Davis IS	Comparison of Tibial Shock during Treadmill and Real-World Running.	10.1249/MSS.0000000000002288	2020	Medicine & Science in Sports & Exercise	observational	Pre	assessing sport-related risk of injury/ predictive factors	laboratory & in field	overuse	soft-tissue and skeletal injuries	lower leg	NS / Insufficient data to be classified	h: 87F, 105M	without current musculoskeletal injury	running	treadmill running	IMU	IMeasureU BlueThunder IMU, Auckland, NZ	mass = 12g; dimensions: 40 x 28 x 15 mm^3	1000	1B	anteromedial aspect of the distal tibia	strap	Digital camera (Exilim EX-100; Casio, Tokyo, JP; 240 Hz); IBM SPSS Statistics (v.25; IBM Corp, Armonk, NY); Treadmill (4Front; Woodway USA Inc., Waukesha, WI)	IMU: vertical and resultant tibial schok acceleration	1	acceleration	kinematics, shock	supported procedures	tibial acceleration	building on established	3
125	Hughes T, Jones RK, Starbuck C, Sergeant JC, Callaghan MJ	The value of tibial mounted inertial measurement units to quantify running kinetics in elite football (soccer) players. A reliability and agreement study using a research orientated and a clinically orientated system	10.1016/j.jelekin.2019.01.001	2019	Journal of Electromyography and Kinesiology	validation	Pre	assessing sport-related risk of injury/ predictive factors	laboratory	overuse	soft-tissue and skeletal injuries	lower leg	elite/international	h: 15M	NS	soccer	treadmill running	3D accelerometer	1. ViPerform, Dorsavi, Melbourne, AU 2. Delsys Tringo IM, Delsys Inc, Natick, Massachusetts, US	NS	a. 140 b. 148.1	2B	medial tibia	a. affixed with disposable application pads and clipped into position b. attached to Tringo Adhesive Skin Interfaces (Delsys Inc,Natik,Massachusetts ,USA) and firmly sited in line with but a 2cm distal to other IMUs	heigth measure and scale (SECA 220,SECA,Hamburg,Germany)	IMU: initial peak acceleration, initial peak acceleration asymmetry	1	acceleration	kinematics, shock	supported procedures	vendors	exploring	1
126	Jaspers A, Kuyvenhoven JP, Staes F, Frencken WGP, Helsen WF, Brink MS	Examination of the external and internal load indicators‚ association with overuse injuries in professional soccer players	10.1016/j.jsams.2017.10.005	2018	Journal of Science and Medicine in Sport	observational	At	assessing sport-related risk of injury/ predictive factors	in field	overuse	soft-tissue and skeletal injuries	NS	highly trained/national level	h: 35M	injuries were diagnosed and recorded	soccer	soccer tasks	3D accelerometer	Minimax S4 and Optimeye S5, Catapult Sports, Melbourne, AU	NS	10Hz	1B	NS	NS	GNSS	IMU: number of acceleration efforts >1 m.s-2, number of deceleration efforts <-1 m.s-2 MIXED: total distance covered, distance covered at high speed >20 km.h-1	1	acceleration	kinematics, demographic	supported procedures	procedure studies\vendors	exploring	3
127	Edwards WB, Derrick TR, Hamill J	Musculoskeletal attenuation of impact shock in response to knee angle manipulation.	10.1123/jab.28.5.502	2012	Journal of Applied Biomechanics	quasi-experimental	Pre	assessing sport-related risk of injury/ predictive factors	laboratory	overuse	soft-tissue and skeletal injuries	lower leg	NS / Insufficient data to be classified	h: 4F, 6M	injury free at least three months before the study	skating	treadmill inline skating	1D accelerometer	PCB Piezotronics Inc., Depew, NY, US	model = 353B	1600	1B; 1E	lateral aspect of the inline just above the malleolous marker; forehead	in Petro wax and fixed to a hard plastic backling before being adhered with double-sided tape; athletic tape (skate); elastic band (head)	8 TVC (Vicon MX, Vicon, Centennial, CO), Vicon Nexus software (Vicon, Centennial, CO), Vicon MX Control A/D board	MOCAP: knee angle IMU: peak acceleration and attenuation, Power Spectral Density of head and leg	2	acceleration	kinematics, shock, frequency analysis	validation	gold standard = stereophotogrammetry	exploring	1
128	Lam W-K, Liebenberg J, Woo J, Park S-K, Yoon S-H, Cheung RT-H, Ryu J	Do running speed and shoe cushioning influence impact loading and tibial shock in basketball players?	10.7717/peerj.4753	2018	PeerJ	quasi-experimental	Pre	assessing sport-related risk of injury/ predictive factors	laboratory	overuse	skeletal injuries, tibial fracture	shank, tibia, fibula	trained/developmental	h:18M	participants were free from any injury six months before the experiment, had received no prior lower extremity surgery	basketball	running	3D accelerometer	DTS 3D, Noraxon, Scottsdale, AZ, US	NS	1500	1B	antero-medial aspect of the proximal one-third of right tibia (vertical axis aligned along the tibia)	NS	timing gates; force plate; 8 TVC motion capturing system (Vicon T40s, Oxford Metrics, Oxford, UK; 240 Hz)	IMU: tibial acceleration, tibial shock FP: vertical ground reaction force, impact peak, vertical average loading rate, vertical instantaneous loading rate MOCAP: footstrike angles (difference between the angle of the foot at impact and the angle during standing)	2	acceleration	kinematics, shock	supported procedures	tibial acceleration	exploring	1
129	Jones A, Page R, Brogden C, Langley B, Greig M	The Influence of Playing Surface on the Loading Response to Soccer-Specific Activity	10.1123/jsr.2019-0327	2020	Journal of Sport Rehabilitation	quasi-experimental	Pre	assessing sport-related risk of injury/ predictive factors	in field	acute	soft-tissue injuries	lower leg	trained/developmental	h: 15M	healthy	soccer	soccer-specific field tests	1D accelerometer	Kionix KX94, Kionix, Ithaca, NY, US	NS	100	3B	C7; posterior aspect of the mid-tibia of the dominant leg and nondominant leg	NS	3 GNSS devices (MinimaxX S4; Catapult Innovations, Scoresby, Australia)	IMU: total accumulated player load in the anteroposterior, mediolateral, and vertical planes OTHER: lower-limb muscle soreness with ratings of perceived exertion (RPE) and visual analog scales	1	acceleration	player load	reference to former validation	validation studies (Player-Load™)	building on established	1
130	Gilgen-Ammann R, Taube W, Wyss T	Gait Asymmetry During 400-to 1000-m High-Intensity Track Running in Relation to Injury History	10.1123/ijspp.2016-0379	2017	International Journal of Sports Physiology and Performance	observational	Pre	assessing sport-related risk of injury/ predictive factors	in field	overuse	soft-tissue and skeletal injuries	lower leg	trained/developmental	h: 3F,3M i: 2F,4M	the injured group included multiple injuries of the lower extremities in the past 24 months	running	running	accelerometer	Axiamote, Axiamo, Biel, CH	mass = 13g; dimensions = 38 × 37 × 8 mm^3	1000	2B	leg	NS	#	IMU: right and left leg ground-contact times, gait asymmetry	1	acceleration	temporal, kinematics	reference to former validation	validation studies	building on established	3
131	Gladh K, Lo Martire R, Äng OB, Lindholm P, Nilsson J, Westman A	Decelerations of Parachute Opening Shock in Skydivers	10.3357/AMHP.4731.2017	2017	Aerospace Medicine and Human Performance	validation	Pre	assessing sport-related risk of injury/ predictive factors	in field	acute and overuse	soft-tissue injuries	head, vertebral column	highly trained/national level	h: 5F, 15M	no ongoing neck problems	skydiving	parachuting	3D accelerometer	ADXL210, Analog Devices, Norwood, MA, US	range = ± 10g; 8-500 bandwidth	1000	1B; 1E	below the cervicothoracic junction over vertebrae T1–T3; bag fastened to the shoulder strap of the rig	in a specific bag; between two layers of elastic suit.	ME6000 system (Mega Muscle Tester, Mega Electronics Ltd, Kuopio, Finland); Barometric altimeter (Altimaster Neptune III v. 6.0.2, Alti-2, Inc., DeLand, FL); Video camera (GoPro Hero2, Woodman Labs, San Francisco, CA)	IMU: 3D acceleration, maximum jerk, initial average jerk	1	acceleration	kinematics	reference to former validation	validation studies	building on established	1
132	Jones A, Brogden C, Page R, Langley B, Greig M	The Influence of Soccer Playing Surface on the Loading Response to Ankle (P)Rehabilitation Exercises	DOI: 10.1123/jsr.2019-0199	2021	Journal of Sport Rehabilitation	quasi-experimental	Pre	assessing sport-related risk of injury/ predictive factors	in field	acute	soft-tissue injuries	ankle	trained/developmental	h: 15M	healthy	soccer	test battery	1D accelerometer	Kionix KX94, Kionix, Ithaca, NY, US	NS	100	3B	C7; posterior aspect of the mid-tibia of both limbs	NS	3 GNSS devices (MinimaxX S4, Catapult, Scoresby, Australia)	IMU: total accumulated player load in the anteroposterior, mediolateral and vertical planes	1	acceleration	player load	reference to former validation	validation studies (Player-Load™)	exploring	1
133	Glassbrook DJ, Fuller JT, Alderson JA, Doyle TLA	Measurement of lower-limb asymmetry in professional rugby league: A technical note describing the use of inertial measurement units	10.7717/peerj.9366	2020	PeerJ	validation	Pre	assessing sport-related risk of injury/ predictive factors	in field	acute and overuse	soft-tissue injuries	lower leg	highly trained/national level	h: 4M	free of injury throughout the study	rugby	rugby match simulations	3D accelerometer	IMeasureU, Auckland, NZ	mass = 12g; dimensions = 40 × 28 × 15 mm^3	500	2B	boot	double-sided adhesive tape and by threading the laces through the unit	#	IMU: total time, area under the curve, and percentage of time spent in seven acceleration categories (negative to very high, <0 g to >16 g), minimum and maximum acceleration during match simulations, asymmetry for area under the curve and percentage of time	1	acceleration	kinematics, demographic	no		exploring	1
134	Greenhalgh A, Sinclair J, Leat A, Chockalingam N	Influence of footwear choice, velocity and surfaces on tibial accelerations experienced by field hockey participants during running	10.1080/19424280.2012.696725	2012	Footwear Science	quasi-experimental	Pre	characterising protective devices	in field	overuse	soft-tissue and skeletal injuries	lower leg	trained/developmental	h: 9M	not experiencing injury events in the last 6 months	field hockey	forward running	3D accelerometer	Biometrics ACL300, Biometrics Ltd, Gwent, UK	range = ± 100g; voltage sensitivity = 100mV/g	1000	1B	distal anteriomedial aspect of the tibia (8 cm above the medial-malleolus)	on a lightweight carbon-fibre plate using a securely glued lightweight bolt, surgical adhesive tape	timing gates (Newtest 300, Oulu, Finland)	IMU: peak tibial acceleration	1	acceleration	kinematics, shock	supported procedures	tibial acceleration	exploring	1
135	Greenhalgh A, Bottoms L, Sinclair J.	Influence of surface on impact shock experienced during a fencing lunge	10.1123/jab.29.4.463	2013	Journal of Applied Biomechanics	quasi-experimental	Pre	assessing sport-related risk of injury/ predictive factors	in field	overuse	soft-tissue and skeletal injuries	lower leg	highly trained/national level	h: 7F, 6M	NS	fencing	lunge	3D accelerometer	Biometrics ACL 300, Gwent, UK	voltage sensitivity ± 100 g	1000	1B	distal anterio-medial aspect of the tibia (8cm from the centre of the medial maleolus)	mounted to a lightweight carbon-fibre plate	#	IMU: mean and SD of magnitude of impact shock, peak and mean of axial acceleration of the footfall	1	acceleration	kinematics, shock	supported procedures	tibial acceleration	exploring	1
136	Greenwald RM, Simpson FH, Michel FI	Wrist biomechanics during snowboard falls	10.1177/1754337113482706	2013	Proceedings of the Institution of Mechanical Engineers, Part P: Journal of Sports Engineering and Technology	observational	Pre	assessing sport-related risk of injury/ predictive factors	laboratory	acute	skeletal injuries	wrist, hand	recreationally active; trained/developmental	h: 3F, 17M	NS	snowboarding	falls	force transducer bend sensors	FLX-03A, Images SI, Staten Island, NY, US; Model 408 FSR, Interlink Electronics, Camarillo, CA, US	Flexible Bend Sensors (resistors); Channels 6, DAQ bits 16, Memory 1 Gbit, Continuous data 4 h, Battery life 50 h, Wrist angle (deg) 100, Force (N) 8000;	512	1B	hand	gloves	#	CAMERA: identification of fall type (fall, hand drag), hand (leading, trailing), direction of fall (forward/backward) OTHER: maximum wrist extension angle DYNA: maximum impact force, maximum wrist extension moment	2	force	kinetics	validation	gold standard = instrumented artificial arm/force plate test apparatus	exploring	2
137	Gross TS, Nelson RC	The shock attenuation role of the ankle during landing from a vertical jump.	10.1249/00005768-198810000-00013	1988	Medicine & Science in Sports & Exercise	observational	Pre	assessing sport-related risk of injury/ predictive factors	laboratory	overuse	soft-tissue and skeletal injuries	lower leg	recreationally active	h: 11M	no reported lower limb injuries	basketball	countermovement jump	1D accelerometer	Endevco, Sunnyvale, California, US	mass = 1g (accelerometer+ support); model = 2222B	1000	2B	overlying the medial surface of the calcaneus; distal anterior-medial portion of the tibia	countersunk and secured in 1*1,5*1,5 cm cubes of balsa wood with a cyano-acrylic glue, fastened to skin with colloidal glue	force platform (Kistler Type 9261; 1000 Hz for vertical force); Locam camera (200 fps) with high speed film	IMU: calcaneus and tibia peak vertical acceleration FP: calcaneus and tibia peak vertical force	2	acceleration	kinematics, shock	pilot validation	pilot	building on established	1
138	Elvin NG, Elvin AA, Arnoczky SP, Torry MR	The Correlation of Segment Accelerations and Impact Forces With Knee Angle in Jump Landing	10.1123/jab.23.3.203	2007	Journal of Applied Biomechanics	observational	Pre	assessing sport-related risk of injury/ predictive factors	laboratory	acute	soft-tissue injuries	knee	recreationally active	h: 6M	no history of orthopedic injury	jump tests	vertical jump	1D accelerometer	ZeroPoint Technologies, Johannesburg, ZA	range = ± 70g; model = ADXL78 (Analog Devices Inc., Norwood, MA), buffer and amplification unit, a microcontroller, and a memory storage bank	1000	3B	mid-shaft of the tibia; mid-thigh; L5	stitched onto tight-fitting elastic belts	force plate (AMTI Inc., Watertown, MA); 7 TVC motion capture system (Motion Analysis Corp., Santa Rosa, CA; 120 Hz);	IMU: segment axial acceleration, segment acceleration–normalized stiffness FP: ground reaction force, jump flight time, jump height, force-normalized stiffness MOCAP: knee angles	2	acceleration	stiffness, kinematics	pilot validation	pilot	exploring	1
139	Hennig EM, Rosenbaum D, Milani TL	Transfer of tennis racket vibrations onto the human forearm	#	1992	Medicine & Science in Sports & Exercise	observational	Pre	assessing sport-related risk of injury/ predictive factors	laboratory	overuse	soft-tissue injuries	upper arm, elbow	sedentary; trained/developmental	h: 5F, 19M	NS	tennis	backhand stroke	1D accelerometer	SenSym SXL200G, Sunnyvale CA, US	NS	12kHz	2B	ulnar head; lateral epicondyle of the humerus	fastened to the skin and elastic wrist bands	#	IMU: wrist and albow accelerations (peak-to-peak acceleration, integrated acceleration) for center and off-center impact OTHER: tennis racket characteristics (mass, racket face area, resonance frequency, string tension)	1	acceleration	kinematics	no		exploring	1
140	Gastin PB, McLean O, Spittle M, Breed RVP	Quantification of tackling demands in professional Australian football using integrated wearable athlete tracking technology.	10.1016/j.jsams.2013.01.007	2013	Journal of Science and Medicine in Sport	observational	Pre	assessing sport-related risk of injury/ predictive factors	in field	acute	soft-tissue and skeletal injuries	NS	highly trained/national level	h: 20M	NS	australian football	australian football tasks	3D accelerometer	MinimaX S4, Catapult Innovations, Melbourne, AU	NS	100	1B	between the shoulder blades	worn in a small pocket in the playing jersey	GNSS, video footage,collected at 50Hz (for coding Sportstec,Sportscode Version 8.4.0]	IMU: player load, acceleration at impact OTHER: peak velocity immediately prior to the point of contact	1	acceleration	kinematics, player load	validation	gold standard = human\software classification	exploring	1
141	García-Pérez JA, Pérez-Soriano P, Llana Belloch S, Lucas-Cuevas AG, Sánchez-Zuriaga D	Effects of treadmill running and fatigue on impact acceleration in distance running	10.1080/14763141.2014.909527	2014	Sports Biomechanics	quasi-experimental	Pre	assessing sport-related risk of injury/ predictive factors	laboratory & in field	overuse	soft-tissue and skeletal injuries	lower leg	trained/developmental	h: 9F, 11M	healthy recreational runners	running	overground and treadmill running	1D accelerometer	MMA7261QT, Freescale Semiconductor©, Munich, DE	mass = 55g (total); dimension = 64 × 42 × 24 mm^3	100	2B	proximal anteromedial aspect of the tibia; the forehead	glued onto the skin with double-sided adhesive tape and secured by elastic belts	#	IMU: peak impact acceleration, time between the minimum acceleration just before foot-strike and the peak impact acceleration, rate of change in acceleration, shock attenuation	1	acceleration	temporal, kinematics, shock	supported procedures	tibial acceleration	building on established	1
142	Gastin PB, McLean OC, Breed RV, Spittle M	Tackle and impact detection in elite Australian football using wearable microsensor technology.	10.1080/02640414.2013.868920	2014	Journal of Sports Sciences	validation	Pre	assessing sport-related risk of injury/ predictive factors	in field	acute	soft-tissue and skeletal injuries	NS	highly trained/national level	h: 20M	NS	australian football	tackles and impacts	3D accelerometer, 3D gyroscope	Minimax X, Catapult, AU	NS	100	1B	on the upper back between shoulder blades	in a small pocket in the jersey	Video recording at 50 Hz, game analysis software (Sportstec, Sportscode Version 8.4.0, Sportstec, Warriewood, NSW, Australia)	IMU: player load, tackle and collision impact events	1	acceleration	demographic, player load	validation	gold standard = human\software classification	exploring	1
143	Gaunaurd I, Kim KJ, Feigenbaum L, Raya M, Barraga M, Fontela N, Gailey R	Construct validation of lower limb segmental excursion as a measure of potential risk for lower limb injury in Division I women's basketball players	10.1016/j.jbiomech.2018.12.029	2019	Journal of Biomechanics	observational	At	assessing sport-related risk of injury/ predictive factors	in field	acute	soft-tissue injuries	lower leg	trained/developmental	h: 12M	not experiencing injury events in the last 24 months	basketball	single limb stance	IMU	CaneSense™	NS	NS	NS	knee	instrumented knee sleeves	Ipad Air 2 tablet (Apple, cupertino,Califronia, USA) with customized CaneSense mobile software	IMU: maximum thight and shank segment excursions in the anterior-posterior and medial-lateral planes, region of limb stability, region of limb stability simmetry	1	acceleration & angular velocity, orientation	kinematics, joint/segment kinematics	reference to former validation	validation studies	exploring	3
144	Eggers TM, Massard TI, Clothier PJ, Lovell R	Measuring vertical stiffness in sport with accelerometers: Exercise caution!	10.1519/JSC.0000000000002318	2018	Journal of Strength and Conditioning Research	validation	Pre	assessing sport-related risk of injury/ predictive factors	laboratory	acute and overuse	soft-tissue and skeletal injuries	lower leg	NS / Insufficient data to be classified	h: 7F, 10M	healthy, injury-free	team sports and individual sports with running	shuttle run test	3D accelerometer	ActiGraph, Pensacola, FL, US	model = wGT3X-BT	100	2B	between the scapulae; around the torso at the lumbar spine (LS;L2)	within a neoprene undergarment; mounted on an adjustable elastic belt	4 600x400 mm force plates (model BP400600-1000, Advanced Mechanical Technology, Inc., Watertown, MA, USA; 2000 Hz)	FP: peak vertical ground reaction force, centre of mass displacement IMU: vertical stiffness	1	acceleration	stiffness	validation	gold standard = force platform	exploring	2
145	Elvin NG, Elvin AA, Arnoczky SP, Torry MR	Correlation Between Ground Reaction Force and Tibial Acceleration in Vertical Jumping	10.1123/jab.23.3.180	2007	Journal of Applied Biomechanics	observational	Pre	assessing sport-related risk of injury/ predictive factors	laboratory	acute	soft-tissue injuries	knee	recreationally active	h: 6M	no history of orthopedic injury	jump tests	vertical jump	1D accelerometer	ZeroPoint Technologies, Johannesburg, ZA	mass= 13g; range = ± 70g; wireless; model = ADXL78 (Analog Devices Inc., Norwood, MA), buffer and amplification unit, a micro-controller, and a memory storage bank;	1000	2B	fibular heads	attached to a tight-fitting Drytex Knee Support (DonJoy Inc., Vista, CA)	force plate (AMTI Inc., Watertown, MA)	IMU: peak tibial axial acceleration, jumph flight time, jump height FP: peak ground reaction force, jump flight time, jump height	1	acceleration	temporal, kinematics, shock	validation	gold standard = force platform	building on established	2
146	Encarnación-Martínez A, Sanchis-Sanchis R, Pérez-Soriano P, García-Gallart A	Relationship between muscular extensibility, strength and stability and the transmission of impacts during fatigued running	10.1080/14763141.2020.1797863	2020	Sports Biomechanics	observational	Pre	assessing sport-related risk of injury/ predictive factors	laboratory	overuse	skeletal injuries, tibial fracture	shank, tibia, fibula	recreationally active	h: 17M	no injuries in the previous 6 months	running	treadmill running	3D accelerometer	Blautic®, Valencia, ES	mass = 16 g; range = ± 16g	300	2B	distal and anteromedial portion of the tibia on the dominant leg; forehead	double sided tape reinforced using neoprene tape (until the comfort limit)	A manual goniometer and inclinometer; isokinetic dynamometer (Biodex System Pro 3TM, Biodex Medical Systems, Inc., New York, USA)	MIXED: maximal aerobic speed, isokinetic strength, dynamic postural control, muscular extensibility, postural control in landing IMU: maximum and total acceleration signal power magnitude in tibia and head, shock attenuation	2	acceleration	kinematics, shock, frequency analysis	supported procedures	tibial acceleration	building on established	1
147	Giandolini M, Pavailler S, Samozino P, Morin J-B, Horvais N	Foot strike pattern and impact continuous measurements during a trail running race: proof of concept in a world-class athlete	10.1080/19424280.2015.1026944	2015	Footwear Science	observational	Pre	understand sport-related injury mechanisms	in field	overuse	skeletal injuries, tibial fracture	shank, tibia, fibula	world class	h: 1M	NS	running	trail running	3D accelerometer	Hikob Agile Fox, Hikob, Villeurbanne, FR	NS	1300	3B	tibia; shoe at the heel and onto the dorsal surface of the foot above the metatarsals	customised elastic strap tightened to the limit of the subject’s comfort; in fitted pockets firmly fixed by elastic straps; shoe	GNSS	IMU: step frequency, peak tibial acc (vertical, antero-posterior,resultant), power spectral density and mean frequency OTHER: running speed, slope, running time	1	acceleration	temporal, kinematics, shock, frequency analysis	supported procedures	tibial acceleration	building on established	2
148	Encarnaciòn-Martìnez A, Pérez-Soriano P, Llana-Belloch S	Differences in Ground Reaction Forces and Shock Impacts Between Nordic Walking and Walking	10.1080/02701367.2014.975178	2015	Research Quarterly for Exercise and Sport	observational	Pre	assessing sport-related risk of injury/ predictive factors	laboratory	overuse	soft-tissue and skeletal injuries	lower leg	recreationally active	h: 10F, 10M	NS	nordic walking	nordic walking and walking	1D accelerometer	SMAA02-1 model, Sportmetrics®	range = ± 10g (tibial tuberosity), ± 5g (frontal bone)	500	2B	tibial tuberosity; frontal bone	fixed with double-sided tape and reinforced with tape and an elastic band	force platform (600 x 400 x 100 mm, Kistler AG, Winrthur, Switzerland)	IMU: shank and head peak acceleration FP: vertical and anterior-posterior ground reaction forces at heel strike and takeoff, mechanical braking and propulsive impulse	2	acceleration	kinematics, shock	supported procedures	tibial acceleration	exploring	1
149	Cummins C, Orr R	Analysis of Physical Collisions in Elite National Rugby League Match Play	10.1123/ijspp.2014-0541	2015	International Journal of Sports Physiology and Performance	observational	Pre	assessing sport-related risk of injury/ predictive factors	in field	acute and overuse	soft-tissue and skeletal injuries	full-body	highly trained/national level	h: 26M	NS	rugby	tackles, hit-ups, collisions during matches	3D accelerometer	SPI-Pro X II, GPSports, Canberra, AU	range = 8 g	100	1B	upper back between the shoulder blades	in a pocket inside playing jersey	GNSS (15 Hz) + Publicly available television footage from each NRL match was used to determine attacking and defensive match-play events	IMU/MIXED: number and frequency of collisions, number and frequency of tackles, number and frequency of hit-ups	1	acceleration	demographic	validation	gold standard = human\software classification	exploring	1
150	De Hoyo M, Cohen DD, Sañudo B, Carrasco L, Álvarez-Mesa A, Del Ojo JJ, Dominguez-Cobo S, Manas V Otero-Esquina C	Influence of football match time-motion parameters on recovery time course of muscle damage and jump ability	10.1080/02640414.2016.1150603	2016	Journal of Sports Sciences	observational	At	assessing sport-related risk of injury/ predictive factors	in field	acute	soft-tissue injuries	lower leg	elite/international	h: 15M	NS	american football	countermovement jump	3D accelerometer	SPI-elite, GPSports, Canberra, ACT, AU	mass = 76 g; dimensions = 48 × 20 × 87 mm;	100	1B	between the shoulder blades	undergarment	Force platform (NMP technologies Ltd,ForceDecks model FD4000a,London,UK); plasma Creatin Kinase assessed pre and post match; GNSS device	FP: CMJ height, average concentric force, average eccentric force IMU: total distance convered, distance covered at specific speed leves, number of accelerations and decelerations, cumulative workload OTHER: creatine kinase	2	acceleration	kinematics, demographic, player load	no		building on established	2
151	de Leeuw AW,Van der Zwaard S,Van Baar R,Knobbe A.	Personalized machine learning approach to injury monitoring in elite volleyball players	10.1080/17461391.2021.1887369	2021	European Journal of Sport Science	observational	At	setting injury threshold criteria AND assessing sport-related risk of injury/ predictive factors	in field	overuse	soft-tissue and skeletal injuries	full-body	elite/international	h: 15M	healthy	volleyball	volleyball tasks	IMU	G-VERT, Mayfonk Inc., Fort Lauderdale, FL, US	NS	NS	1B	trunk near the centre of mass	elastic band	#	IMU: number of jumps, jump height	1	acceleration & angular velocity	kinematics, demographic	reference to former validation	validation studies	building on established	3
152	Derrick TR, Hamill J, Caldwell GE	Energy absorption of impacts during running at various stride lengths	10.1097/00005768-199801000-00018	1998	Medicine & Science in Sports & Exercise	quasi-experimental	Pre	assessing sport-related risk of injury/ predictive factors	laboratory	overuse	soft-tissue and skeletal injuries	lower leg	NS / Insufficient data to be classified	h: 10M	no extremity abnormalities were apparent in the gait of any of the subjects	running	running	3D accelerometer	PCB Piezotronics Inc., Depew, NY, US	mass = 1.7 g (+mounting bracket mass= 3.8 g); frequency range = 0.35 Hz ~ 30 kHz; resonant frequency > 70 kHz; resolution = 0.01 g; model = 353B17; battery driven (model 480E06, PCB Piezotronics) with selectable gain of 1, 10 or 100	1000	2B	distal anteromedial aspect of the tibia; frontal bone of the head (forehead)	secured with elastic straps tightened to the treshold of subject tolerance	data logger (tattletale model 7, Onset Computer Corp., Pocasset, MA), micro computer, infrared device, AMTI strain gauge force platform (12-bit ADC; 1000 Hz); NAC camera (model MOS v-14, Motion Analysis VP-110; 200Hz)	CAMERA: preferred stride length, progression velocity, hip, knee and ankle angles IMU: tibia and head accelerations, mean peak tibial acceleration, mean peak head acceleration, mean impact attenuation Power Spectral Density of head and leg accelerations MIXED: joint moments, joint muscle power	2	acceleration	kinematics, shock, frequency analysis	supported procedures	tibial acceleration	building on established	2
153	Derrick TR, Dereu D, McLean SP	Impacts and kinematic adjustments during an exhaustive run	10.1097/00005768-200206000-00015	2002	Medicine & Science in Sports & Exercise	observational	Pre	assessing sport-related risk of injury/ predictive factors	laboratory	overuse	soft-tissue and skeletal injuries	lower leg	recreationally active	h: 10 (gender NS)	injury free at participation, history NS	running	running	accelerometer	PCB Piezotronics Inc., Depew, NY, US	mass = 1.8g; piezoelectric	1000	2B	distal anteromedial aspect of the tibia; frontal bone of the skull	double-sided carpet tape, prewrap, and athletic tape	custom-built knee electrogoniometer; custom-built rearfoot electrogoniometer	IMU: stride frequency, stride length, peak leg and head impact accelerations, power spectral densities of accelerations at the head and leg OTHER: knee and rearfoot angular velocities	2	acceleration	temporal, kinematics, shock, frequency analysis	supported procedures	tibial acceleration	building on established	2
154	Dowling AV, Favre J, Andriacchi TP	A wearable system to assess risk for anterior cruciate ligament injury during jump landing: measurements of temporal events, jump height, and sagittal plane kinematics	10.1115/1.4004413	2011	Journal of Biomechanical Engineering	validation	Pre	assessing sport-related risk of injury/ predictive factors	laboratory	acute	soft-tissue injuries, ACL	knee	recreationally active	h: 18F, 20M	previous lower limb musculoskeletal injuries requiring surgery or any current symptoms of pain or injury were excluded.	jump tests	jump landing	a. 3D accelerometer, 3D gyroscope b. 2D accelerometer, 1D gyroscope	Physilog1, BioAGM, CH	range = ±7g; a. range = ±900deg/s; b. range = ±600deg/s	240	3B	a. thigh; shank b. chest (on the manubrium)	a. rigid lightweight plastic plates, elastic straps b. tape	(Qualisys Medical, Gothenburg, SE), 10 cameras, 120 Hz. Two 6DOF force plates (Bertec, Columbus, OH), 1200 Hz	IMU: jump height, knee flexion angle, trunk lean	1	orientation	kinematics, joint/segment kinematics	validation	gold standard = stereophotogrammetry and force platforms	exploring	1
155	Dowling AV, Favre J, Andriacchi TP	Inertial Sensor-Based Feedback Can Reduce Key Risk Metrics for Anterior Cruciate Ligament Injury During Jump Landings	10.1177/0363546512437529	2012	The American Journal of Sports Medicine	quasi-experimental	Pre	assessing sport-related risk of injury/ predictive factors	laboratory	acute	soft-tissue injuries, ACL	knee	recreationally active	h: 7F, 10M	no previous lower limb musculoskeletal injuries requiring surgery; no current symptoms of pain or injury	jump tests	two-legged drop-jump	3D accelerometer, 3D gyroscope	Physilog, BioAGM, La Tour de peilz, CH	NS	240	3B	chest; thigh; shank segment	NS	#	IMU: knee flexion angle, trunk lean, thigh coronal angular velocity, jump height	1	angular velocity, orientation	kinematics, joint/segment kinematics	reference to former validation	validation studies	exploring	1
156	Dowling AV, Favre J, Andriacchi TP	Characterization of Thigh and Shank Segment Angular Velocity During Jump Landing Tasks Commonly Used to Evaluate Risk for ACL Injury	10.1115/1.4007178	2012	Journal of Biomechanical Engineering	observational	Pre	assessing sport-related risk of injury/ predictive factors	laboratory	acute	soft-tissue injuries, ACL	knee	recreationally active	h: 18F, 18M	no previous lower limb musculoskeletal injuries requiring surgery; no current injury	jump tests	one- and two-legged drop-jump	3D accelerometer, 3D gyroscope, 3D magnetometer	Physilog, BioAGM, La Tour de peilz, CH	range = ±67g; range = 6900deg/s	240	2B	thigh; shank	NS	10 TVC motion capture system (Qualisys Medical, Gothenburg, SE; 120 Hz); force plate (Bertec, Columbus, OH; 1200Hz)	IMU: thigh and shank angular velocities MOCAP: external knee moments	1	angular velocity	kinematics	reference to former validation	validation studies	building on established	2
157	Colapietro M, Fraser JJ, Resch JE, Hertel J	Running mechanics during 1600 meter track runs in young adults with and without chronic ankle instability.	10.1016/j.ptsp.2019.11.010	2019	Physical Therapy in Sport	observational	Pre	assessing sport-related risk of injury/ predictive factors	in field	acute	soft-tissue injuries, ankle sprain	ankle	recreationally active	h: 9 i: 9 (gender NS)	participants were included in the CAI group if they had a prior history of at least one significant ankle sprain at least one year prior to the study, history of more than one ankle sprain in the ankle, and reported decreased functional ankle deficits on patient-reported outcome measures	running	treadmill running	3D accelerometer, 3D gyroscope	RunScribeTM Pro 2x, RunScribe Labs, Half Moon Bay, CA	mass = 8g; dimensions = 35 x 25 x 7.5 mm^3; range = ±16g; range = ± 2000deg	200	1E	heel counter of both running shoes	the supplied clips and paired to a mobile phone	A preloaded stopwatch application on an iPhone 6 (Apple Inc., Cupertino, CA)	IMU: pronation excursion, maximum pronation velocity, peak braking and impact g, contact time, cycle time and stride length of every step	1	acceleration & angular velocity, orientation	temporal, kinematics, joint/segment kinematics	reference to former validation	validation studies	building on established	3
158	Giandolini M, Horvais N, Farges Y, Samozino P, Morin J-B	Impact reduction through long-term intervention in recreational runners: midfoot strike pattern versus low-drop/low-heel height footwear	10.1007/s00421-013-2634-7	2013	European Journal of Applied Physiology	quasi-experimental	Pre	gait retraining	laboratory	overuse	skeletal injuries, tibial fracture	shank, tibia, fibula	recreationally active	h: 8F, 22M	not presenting recent muscular, joint or bone injuries, or receiving any medication	running	running	1D accelerometer	ADXL150, Analog Devices, Norwood, MA, US	NS	1000	3B	on the anteromedial aspect of the distal third of the tibia (from medial malleolus to femoral condyle); above the midsole at the heel; fifth metatarsal head level	fixed with Dual Lock™ (3M, St. Paul, USA) and strapped	heart rate monitor (Polar RS800, Kempele, Finland) instrumented treadmill (HEF Tecmachine, Andrézieux-Bouthéon)	IMU: peak acceleration at the heel, tibia and metatarsal levels, shock wave propagation velocity between heel and tibia, time between peak acceleration at the heel and metatarsal levels FP: foot contact timings, force impact peak, time to impact peak, vertical mean loading rate	1	acceleration	temporal, kinematics, shock	no		building on established	2
159	Cong Y, Lam WK, Cheung JTM, Zhang M	In-shoe plantar tri-axial stress profiles during maximum-effort cutting maneuvers	10.1016/j.jbiomech.2014.10.028	2014	Journal of Biomechanics	observational	Pre	assessing sport-related risk of injury/ predictive factors	laboratory	acute	soft-tissue injuries	lower leg	trained/developmental	h: 17M	NS	basketball	lateral shuffling and sidestep cutting	3D force transducers	Bioforcen Intelligent Technology Inc., Anhui, CN	Dimensions = thickness 9mm, top and base surfaces diameters of 17 and 18mm. Measurement errors and cross talk between any two channels of less than 2%. Full-scale force measurements of 500N (2174kPa) and 300N (1304kPa) for normal and shear forces, respectively. The measurement sensitivity with temperature was less than 1%/1C.	NS	4E	right shoe at four locations	inserted in the midsole	motion capture system (Vicon,OxfordMetrics,UK) at 200 Hz; force platforms (AdvancedMechanicalTechnologyInc.,Watertown,MA,USA) at 1200 Hz	MOCAP: shoe-shank kinematics FP: ground reaction force DYNA: in-shoe tri-axial stress related variables (maximum and mean loading rates, peak values in braking and propulsion phases)	2	force	kinetics	pilot validation	pilot	building on established	2
160	Colby MJ, Dawson B, Heasman J, Rogalski B, Gabbett TJ.	Accelerometer and GPS-derived running loads and injury risk in elite Australian footballers	10.1519/JSC.0000000000000362	2014	Journal of Strength and Conditioning Research	observational	At	assessing sport-related risk of injury/ predictive factors	in field	acute and overuse	soft-tissue and skeletal injuries	full-body	highly trained/national level	h: 46M	NS	australian football	australian football tasks	3D accelerometer	SPI Pro X, GPSports, Canberra, AU	NS	100	1B	Between the scapulae	In a pocket sewn into the playe’s jumper or in a fitted GPSports harness	GNSS	IMU: force load, workload OTHER: total distance, total distance above individual’s aerobic threshold speed, sprint distance MIXED: velocity load, relative velocity change	1	acceleration	player load	reference to former validation	validation studies	building on established	3
161	Creaby MW, Smith MMF	Retraining running gait to reduce tibial loads with clinician or accelerometry guided feedback	10.1016/j.jsams.2015.05.003	2016	Journal of Science and Medicine in Sport	quasi-experimental	Pre	gait retraining	laboratory	overuse	skeletal injuries, tibial fracture	shank, tibia, fibula	recreationally active	h: 11M	without (i) any current injuries; (ii) any current or past disease, condition or surgery which may affect running or walking patterns	running	treadmill running	3D accelerometer	PCB356A32/NC, PCB Piezotronics Inc., Buffalo, NY, US	NS	1500	1B	antero-medial distal tibia (axes aligned with the cardinal axes of rotation)	secured in place with several layers of tape (Omnifix, Hartmann, Rhodes,NSW, Australia)	#	IMU: peak tibial axial acceleration	1	acceleration	kinematics, shock	supported procedures	tibial acceleration	building on established	2
162	Coventry E, O’Connor KM, Hart BA, Earl JE, Ebersole KT	The effect of lower extremity fatigue on shock attenuation during single-leg landing	10.1016/j.clinbiomech.2006.07.004	2006	Clinical Biomechanics	quasi-experimental	Pre	assessing sport-related risk of injury/ predictive factors	laboratory	overuse	soft-tissue and skeletal injuries	lower leg	recreationally active	h: 8M	no history of lower extremity injury in the previous 6 months	jump tests	single-leg landing	accelerometer	PCB Piezotronics Inc., Depew, NY, US	mass= 1.7g; model = 353B17; quartz shear piezoelectric	1000	2B	tibia (distal anteromedial aspect); forehead (frontal bone)	elastic straps	force platform (OR6-5vAMTI, Watertown, MA, USA); non-conducting force platform (Type 4060-NC, Bertec Corporation, Columbus, OH, USA); MotionMonitor electromagnetic tracking system (version 4.10, Innovative Sports Training, Inc., Chicago, IL, USA)	IMU: tibia and forehead accelerations FP: ground reaction forces MOCAP: sagittal plane joint angles at touchdown, maximum joint flexion angles, joint ranges of motion, hip, knee, and ankle peak joint angular velocities MIXED: hip, knee, and ankle peak joint moments, hip, knee, and ankle peak joint powers, hip, knee, and ankle net negative work, whole-body power output from the single-leg CMJ	2	acceleration	kinematics, shock	supported procedures	tibial acceleration	building on established	2
163	Crowell HP, Milner CE, Hamill J, Davis IS	Reducing impact loading during running with the use of real-time visual feedback.	10.2519/jospt.2010.3166	2010	Journal of Orthopaedic & Sports Physical Therapy	quasi-experimental	Pre	gait retraining	laboratory	overuse	skeletal injuries, tibial fracture	shank, tibia, fibula	recreationally active	h: 5F	Single-subject design. Prevention, level 5.	running	treadmill running	1D accelerometer	PCB Piezotronics Inc., Depew, NY, US	NS	1080	1B	antero-medial distal tibia	tape (Elastikon; Johnson & Johnson, Somerville, NJ) wrapped around the accelerometer and the subject’s distal tibia	custombuilt treadmill instrumented with 4 force transducers (Frappier Acceleration, Fargo, ND)	IMU: peak positive tibial axial acceleration FP: vertical instantaneous loading rate, vertical average loading rate, vertical impact peak	2	acceleration	kinematics, shock	supported procedures	tibial acceleration	building on established	2
164	Chen Y, Li JX, Hong Y, Wang L	Plantar stress-related injuries in male basketball players: variations on plantar loads during different maximum-effort maneuvers.	10.1155/2018/4523849	2018	BioMed Research International	observational	Pre	assessing sport-related risk of injury/ predictive factors	in field	overuse	soft-tissue and skeletal injuries	lower leg	NS / Insufficient data to be classified	h: 16M	NS	basketball	cutting maneuvers	pressure sensor	Pedar Mobile system, Novel GmbH, Munich, DE	NS	100	2E	between shoes insole and foot plantar surface	insole	synchronized video camera (9800, JVC Inc., Japan; 100 Hz)	PRESS: peak pressures and maximum force for total foot and for each foot mask	1	pressure	kinetics	no		exploring	1
165	Cheung RTH, Zhang JH, Chan ZYS, An WW, Au IPH, MacPhail A, Davis IS	Shoe‐mounted accelerometers should be used with caution in gait retraining	10.1111/sms.13396	2018	Scandinavian Journal of Medicine & Science In Sports	quasi-experimental	Pre	gait retraining	laboratory	overuse	soft-tissue and skeletal injuries	lower leg	a. Not specified / Insufficient data to be classified b. recreationally active	walking group h: 11F, 13M running group: h: 7F, 7M	free from any active injury 12 months before the experiment and had received no prior lower extremity surgery	running	treadmill running and walking	2D accelerometer	ADXL278, iMEMS, Analog Devices, Norwood, MA, US	mass = 0.16g; dimensions= 5 x 5 x 2 mm^3; range = ± 50g	1000	1B, 1E	posterior heel counter of the shoe; antero‐medial aspect of the tibia	surgical tape and self‐adherent bandage	#	IMU: peak positive shoe acceleration, peak positive tibial axial acceleration, vertical average loading rate, vertical instantaneous loading rate	1	acceleration	kinematics, shock	supported procedures	tibial acceleration	building on established	2
166	Cheung RTH, An WW, Au IPH, Zhang JH, Chan ZYS, MacPhail AJ	Control of impact loading during distracted running before and after gait retraining in runners	10.1080/02640414.2017.1398886	2017	Journal of Sports Sciences	quasi-experimental	Pre	gait retraining	laboratory	overuse	soft-tissue and skeletal injuries	lower leg	recreationally active	h: 5F, 15M	any lower limb surgery or any neurological condition were excluded	running	running	3D accelerometer	Maestro WB, 01DB-Stell, Limonest, FR	NS	1000	1E	posterior surface of the heel counter of the right shoe (aligned with the long axis of the tibia)	tape	#	IMU: peak positive tibial axial acceleration, vertical average loading rate, vertical instantaneous loading rate	1	acceleration	kinematics, shock	supported procedures	tibial acceleration	building on established	2
167	Chan Y-Y, Fong D, Chung M, Li W-J, Hao W-H, Yung P, Chan K-M	Identification of ankle sprain motion from common sporting activities by dorsal foot kinematics data	10.1016/j.jbiomech.2010.03.014	2010	Journal of Biomechanics	validation	At	understand sport-related injury mechanisms	laboratory	acute	soft-tissue injuries, ankle sprain	ankle	recreationally active	h: 6M	no previous ankle injury; no ankle abnormality	common sporting activities	ankle sprain motion	3D accelerometer, 3D gyroscope	Sengital Ltd., Hong Kong, CN	dimensions = 20 x 18 x 6 mm^3	500	8B	foot at hallux; first proximal metatarsal head; fifth distal metatarsal head; fifth proximal metatarsal head; medial calcaneus; posterior calcaneus; lateral malleolus and tibia	attached to the skin	#	IMU: ankle sprain motion	1	orientation	kinematics, joint/segment kinematics	validation	gold standard = human\software classification	building on established	2
168	Cummins C, Orr R	Collision characteristics of shoulder charge tackles in elite rugby league	10.1080/24748668.2015.11868853	2015	International Journal of Performance Analysis in Sport	observational	Pre	assessing sport-related risk of injury/ predictive factors	in field	acute and overuse	soft-tissue and skeletal injuries	full-body	highly trained/national level	h: male players (number NS)	NS	rugby	shoulder charge tackles	3D accelerometer	SPI-Pro XII, GPSports, Canberra, AU	NS	100	1B	upper back (between the shoulder blades)	in a pocket inside the playing jersey	GNSS (15Hz); video footage	CAMERA: tackles (total number, type: conventional, shoulder charge or high tackle), shoulder charge incidence MIXED: collision data (intensity and force distribution)	2	acceleration	demographic	validation	gold standard = human\software classification	exploring	1
169	Giandolini M, Horvais N, Rossi J, Millet GY, Samozino P, Morin JB	Foot strike pattern differently affects the axial and transverse components of shock acceleration and attenuation in downhill trail running	10.1016/j.jbiomech.2016.04.001	2016	Journal of Biomechanics	observational	Pre	assessing sport-related risk of injury/ predictive factors	laboratory	overuse	soft-tissue and skeletal injuries	NS	trained/developmental	h: 23M	injury-free in the six months preceding the experiment	running	downhill running	3D accelerometer	Agile Fox, Hikob, Villeurbanne, FR	NS	1344	4B	left shoe; heel above the midsole; on top of the shoe above themetatarsals	customized Velcro strap; customized belt; fixed on the left shoe	air pressure sensor (12Hz)	IMU: time between heel and metatarsal peak accelerations, magnitude of axial accelerations. power spectral density and media frequency of the accelerations, shock attenuation = ration between sacrum and tibia power spectral density	1	acceleration	kinematics, shock, frequency analysis	supported procedures	tibial acceleration	building on established	2
170	Clansey AC, Hanlon M, Wallace ES, Lake MJ	Effects of Fatigue on Running Mechanics Associated with Tibial Stress Fracture Risk	10.1249/MSS.0b013e318259480d	2012	Medicine & Science in Sports & Exercise	observational	Pre	understand sport-related injury mechanisms	laboratory	overuse	skeletal injuries, tibial fracture	shank, tibia, fibula	highly trained/national level	h: 21M	no musculoskeletal injury	running	running	2D accelerometer	Noraxon, Scottsdale, AZ, US	mass = 16 g; sensitivity range of ±400 mV/g; frequency response = 5–6 kHz	1500	2B	distal anteromedial aspect of the tibia; anterior aspect of the forehead	water-repellent adhesive tape (Kinesiology tape; Vivomed, UK)	12 TVC motion capture system (Oqus3; Qualisys, Sweden); force platform (type 9287CA; Kistler Instruments Limited, Switzerland; 1000 Hz); photoelectric gates (TCPhotoGate; Brower Timing System, UK)	IMU: peak head acceleration, peak tibial axial acceleration, vertical impact peak MOCAP: step length, knee range of motion, adduction knee peak free moment, peak rearfoot eversion, peak hip adduction FP: vertical average loading rates, vertical instantaneous loading rates MIXED: knee sagittal plane joint stiffness OTHER: rate of perceived exertion (RPE) scores	2	acceleration	kinematics, shock	supported procedures	tibial acceleration	building on established	2
171	Clarke TE, Cooper LB, Hamill CL, Clark DE	The effect of varied stride rate upon shank deceleration in running.	10.1080/02640418508729731	1985	Journal of Sports Sciences	quasi-experimental	Pre	assessing sport-related risk of injury/ predictive factors	laboratory	overuse	soft-tissue and skeletal injuries	lower leg	recreationally active	h: 10 (gender NS)	NS	running	treadmill running	accelerometer	NS	mass = 4 g; piezoresistive	2000	2B	medial anterior face of the distal tibia	encased in balsa wood and attached with elastic straps	High-speed cine films (200 Hz)	IMU: relative peak shank deceleration, stride rate CAMERA: join kinematics	1	acceleration	temporal, kinematics	pilot validation	pilot	exploring	1
172	Clermont CA, Benson LC, Edwards WB, Hettinga BA, Ferber R	New Considerations for Wearable Technology Data: Changes in Running Biomechanics During a Marathon	10.1123/jab.2018-0453	2019	Journal of Applied Biomechanics	observational	Pre	assessing sport-related risk of injury/ predictive factors	in field	overuse	soft-tissue and skeletal injuries	lower leg	trained/developmental	h: 15F, 12M	no injury at the start of the study	running	marathon race	3D accelerometer, 3D gyroscope, 3D magnetometer	Lumo Run®, Lumo Bodytech Inc, Mountain View, CA	NS	100	1B	near the center of mass, aligned with the spine	clipped to the back of each runner’s shorts	#	IMU: cadence (step frequency, in steps per minute), braking (change in forward velocity, meters per second), bounce (vertical oscillation, in centimeters), pelvic rotation (side-to-side movement of the pelvis, in degrees), pelvic drop (side-to-side drop of the pelvis, in degrees), ground contact time (time foot is in contact with the ground at each step, in milliseconds)	1	acceleration & angular velocity, orientation	temporal, kinematics, joint/segment kinematics	pilot validation	pilot	exploring	1
173	Clermont CA, Pohl AJ, Ferber R	Fatigue-Related Changes in Running Gait Patterns Persist in the Days Following a Marathon Race	10.1123/jsr.2019-0206	2020	Journal of Sport Rehabilitation	observational	Pre	assessing sport-related risk of injury/ predictive factors	in field	overuse	soft-tissue and skeletal injuries	NS	trained/developmental	h: 10F, 7M	not reporting any self-reported cardiac risk, lower-extremity running-related injury within the previous 6 months, history of major surgery to the lower-extremity, the use of orthotics, or medical conditions/medications that would impair balance.	running	overground running	3D accelerometer	Shimmer3®, Shimmer Inc, Dublin, IE	range = ± 8g	201.03	1B	lower back, in line with the navel at a vertical level corresponding to the junction between the L3 and L5 vertebrae	with elastic straps	#	IMU: spatiotemporal parameters (cadence, step time, stride time), regularity of the accelerometer waveform in each direction, peak acceleration and RMS in each direction	1	acceleration	temporal, kinematics	supported procedures	back acceleration	building on established	1
174	Brizuela G, Llana S, Ferrandis R, Garcia-Belenguer AC	The influence of basketball shoes with increased ankle support on shock attenuation and performance in running and jumping	10.1080/026404197367146	1997	Journal of Sports Sciences	quasi-experimental	Pre	characterising protective devices	laboratory	acute	soft-tissue injuries, ankle sprain	ankle	recreationally active	h: 8M	healthy	basketball	vertical jump	accelerometer	ICSENSORS 3031	mass = 0.3g; range = 20 g; piezoresistive; resonance frequency = 1200 Hz; sensitivity = 2.1 mV/g	1000	2B	forehead and proximal anterior surface of right tibia 3-4cm below tibial tuberosity	fixed to an aluminium frame and attached to the skin with double-sided adhesive; an elastic bandage wrapped tightly around the shank	force plate (Dinascan-IBV)	IMU: tibial and forehead acceleration, shock transmission ratio through the body FP: ground reaction force, shock transmission ratio through the body CAMERA: knee and ankle angles, eversion angle	2	acceleration	kinematics	supported procedures	tibial acceleration	exploring	1
175	Brown W, Greig M	Tri-axial Accelerometry as an Injury Predictor Tool in Elite Soccer	10.1123/ijatt.2017-0004	2017	International Journal of Atletic Therapy and Training	observational	At	understand sport-related injury mechanisms	in field	acute	soft-tissue injuries, ankle sprain	ankle	elite/international	i: 26M	1M with reccurring ankle sprain	soccer	soccer	3D accelerometer	STATSports Viper	NS	100	1B	between the scapulae	neoprene harness	#	IMU: integral of the acceleration-time data along medio-lateral, anterio-posterior and vertical axes	1	acceleration	kinematics	no		exploring	2
176	Brownridge A, Twigg P, Sigurnjak S	Measurement of human motion in performance	10.1177/002029401304600103	2013	Measurement and Control	validation	Pre	assessing sport-related risk of injury/ predictive factors	laboratory	acute	soft-tissue injuries, ankle sprain	ankle	NS / Insufficient data to be classified	h: 1F, 1M	NS	dancing	ballet	3D gyroscope	Animazoo IGS-190 inertial motion capture suit	NS	120	18B	full body suit; E position NS	within the elastene suit	#	IMU: degrees of ankle inversion and eversion	1	orientation	joint/segment kinematics	no		building on established	1
177	Butler RJ, Hamill J, Davis I	Effect of footwear on high and low arched runners’ mechanics during a prolonged run	10.1016/j.gaitpost.2006.09.015	2006	Gait & Posture	quasi-experimental	Pre	assessing sport-related risk of injury/ predictive factors	laboratory	overuse	soft-tissue and skeletal injuries	lower leg	recreationally active	h: 12 high arch, 12 low arch (gender NS)	healthy	running	treadmill running	1D accelerometer	PCB Piezotronics Inc., Depew, NY, US	mass = 2.83g	1080	1B	anteromedial and distal portion of the tibia	attached with double sided tape, then wrapped with Coban (Johnson & Johnson, Arlington, TX) followed by a wrap of Elastikon (Johnson & Johnson, Arlington, TX), around the circumference of the tibia	six camera Vicon motion analysis system (Vicon Motion Systems Ltd., Oxford, England, @120 Hz)	IMU: peak rearfoot eversion and rearfoot eversion excursion, peak tibial internal rotation, tibial internal rotation excursion, peak positive tibial acceleration, peak to peak tibial acceleration	1	acceleration, orientation	kinematics, joint/segment kinematics, shock	supported procedures	tibial acceleration	building on established	2
178	Camp CL, Tubbs TG, Fleisig GS, Dines JS, Dines DM, Altchek DW, Dowling B.	The Relationship of Throwing Arm Mechanics and Elbow Varus Torque: Within-Subject Variation for Professional Baseball Pitchers Across 82,000 Throws.	10.1177/0363546517719047	2017	The American Journal of Sports Medicine	observational	Pre	assessing sport-related risk of injury/ predictive factors	in field	acute and overuse	soft-tissue and skeletal injuries	upper arm, elbow	elite/international	h: 81M	NS	baseball	pitching	3D accelerometer, 3D gyroscope	motusBASEBALL	mass = 6.9 g; dimension = 38 x 25 x 10 mm^3; memory = 16 Mbit	1000	1B	medial forearm (5 cm distal to the medial epicondyle of the humerus)	sleeve	#	IMU: meand and SD for arm slot, arm speed, arm rotation, elbow varus torque	1	acceleration & angular velocity, orientation	kinematics, joint/segment kinematics, kinetics	validation	gold standard = stereophotogrammetry	exploring	2
179	Cazzola D, Preatoni E, Stokes KA, England ME, Trewartha G	A modified prebind engagement process reduces biomechanical loading on front row players during scrummaging: A cross-sectional study of 11 elite teams	10.1136/bjsports-2013-092904	2015	British Journal of Sports Medicine	quasi-experimental	Pre	assessing sport-related risk of injury/ predictive factors	in field	acute and overuse	soft-tissue and skeletal injuries	vertebral column	elite/international	h: 176M (11 teams)	healthy	rugby	scrummaging	1) 3D accelerometer, 3D gyroscope, 3D magnetometer; 2) pressure sensor	1) MTw, Xsens Technologies B.V. Enschede, NL; 2) Model #3005E VersaTek-XL siz2	1) NS; 2) NS	1) 50; 2) 500Hz	1) 1B; 2) 2B	1) C7 vetebra; 2) shoulder	1) NS; 2) trimmed to fit into bespoke sleeves	4 digital video cameras (HDR-HC9, Sony, Japan; 50Hz)	PRESS: peak total compression force at shoulder level, loss total compression force IMU: peak acceleration at C7 level CAMERA: hip angle, vertical scrum excursion in sagittal plane during the Approach, Engagement and Sustained push phases	2	pressure, acceleration	kinematics, kinetics	reference to former validation	validation studies	building on established	2
180	Enders H, von Tscharner V, Nigg BM	The effects of preferred and non-preferred running strike patterns on tissue vibration properties	10.1016/j.jsams.2013.03.015	2014	Journal of Science and Medicine in Sport	quasi-experimental	Pre	assessing sport-related risk of injury/ predictive factors	laboratory	overuse	soft-tissue and skeletal injuries	lower leg	recreationally active	12M	NS	running	treadmill running	a. 1D accelerometer b. 3D accelerometer	custom-made ADXL 78, Analog Devices, Norwood, MA, US	range = 35g; frequency response = 0–400Hz	2400	3B	muscle belly of the medial gastrocnemius; heel; 5MTPH	medical adhesive glue and then pre-loaded to the skin with stretch adhesive bandage	#	IMU: mean and median frequencies of the acceleration power spectrum, damping coefficient of the vibration signal	1	acceleration	kinematics, shock, frequency analysis	supported procedures	tibial acceleration	exploring	1
181	Chadefaux D, Gueguen N, Thouze A, Rao G	3D propagation of the shock-induced vibrations through the whole lower-limb during running	10.1016/j.jbiomech.2019.109343	2019	Journal of Biomechanics	observational	Pre	assessing sport-related risk of injury/ predictive factors	laboratory	overuse	soft-tissue and skeletal injuries	vertebral column, lower leg	recreationally active	h: 10M	healthy	running	running	3D accelerometer	Noraxon, Scottsdale, AZ, US	mass = 5.7 g; dimensions: 19 x 14.2 x 6.3 mm^3; range = ± 24g; frequency range = 5 ~ 1800 Hz; resolution = 0.01 g	1000	4B	third metatarsal bone; distal extremity of the medial surface of the tibia; lateral epicondyle of the femur; greater trochanter of the femur	fixed to the skin using double-sided adhesive tape and secured with adhesive band wrapping the sensors and the body part	#	IMU: maximum of the vibration magnitude, vibration amplitude, acceleration level of the vibration magnitude, vibration energy along the x, y, z axes	1	acceleration	vibration	supported procedures	tibial acceleration	building on established	2
182	Agresta CE, Peacock J, Housner J, Zernicke RF, Zendler JD	Experience does not influence injury-related joint kinematics and kinetics in distance runners	10.1016/j.gaitpost.2017.12.020	2017	Gait & Posture	observational	Pre	assessing sport-related risk of injury/ predictive factors	laboratory	overuse	soft-tissue and skeletal injuries	lower leg	trained/developmental	h: 50F, 50M	healthy and free of musculoskeletal injury	running	treadmill running	3D accelerometer	MyoMotion, Noraxon USA, Arizona, US	range = ± 16g; range = ± 2000 deg/s	200	8B	bilaterally to the feet; shanks; thighs; pelvis; upper thorax	NS	#	IMU: vertical impact peak, loading rate, active peak, foot strike angle, knee flexion angle at foot strike, peak knee flexion during contact, peak hip adduction during contact, peak hip internal rotation during contact, peak trunk flexion during contact, stride rate, stride time stride length, contact time, flight time	1	acceleration, orientation	temporal, kinematics, joint/segment kinematics	reference to former validation	validation studies	exploring	2
183	Amaro, A.M, Paulino, M.F, Neto, M.A, Roseiro, L.	Hand-arm vibration assessment and changes in the thermal map of the skin in tennis athletes during the service	10.3390/ijerph16245117	2019	International Journal of Environmental Research and Public Health	quasi-experimental	Pre	characterising protective devices	in field	overuse	soft-tissue injuries	upper arm, elbow	trained/developmental	h: 6M	NS	tennis	serve	3D accelerometer	ICPR/IEPE Integrated Circuit Piezoelectric	NS	1000	1E	on the racket, over the grip at a distance of 10.9cm from the tip of the over-grip	NS (from figure with tape)	Infrared Thermography	IMU: hand-arm vibration (daily exposure action value and daily esposure limit value) OTHER: temperature in dirrefer regions of interest	1	acceleration	vibration	supported procedures	ISO	building on established	2
185	Barrett S, Midgley A, Reeves M, Joel T, Franklin E, Heyworth R, Garrett A, Lovell R	The within-match patterns of locomotor efficiency during professional soccer match play: Implications for injury risk?	10.1016/j.jsams.2015.12.514	2015	Journal of Science and Medicine in Sport	observational	Pre	assessing sport-related risk of injury/ predictive factors	in field	overuse	soft-tissue and skeletal injuries	NS	elite/international	h: 64M	NS	soccer	soccer tasks	3D accelerometer	MinimaxX S4, Catapult Innovations, Scoresby, Victoria, AU	range = ± 13g	100	1B	between the scapulae	customised tight-fitting neoprene garment underneath their match day shirts	GNSS (10 Hz)	IMU: player load vector magnitude, anterior–posterior player load, medial–lateral player load, vertical player load, total distance covered	1	acceleration	kinematics, player load	reference to former validation	validation studies (Player-Load™)	building on established	2
185	Chambon N, Delattre N, Guéguen N, Berton N, Rao G	Is midsole thickness a key parameter for the running pattern?	10.1016/j.gaitpost.2014.02.005	2014	Gait & Posture	quasi-experimental	Pre	characterising protective devices	laboratory	overuse	soft-tissue injuries	lower leg	NS / Insufficient data to be classified	h: 15M	healthy	running	overground running	3D accelerometer	Endevco1, Isotron 65HT	mass = 5 g	2000	1B	on the medial face of the tibia halfway between medial maleolus and medial knee condyle	fixed on a balsa wood board (20 mm X 10 mm X 2 mm) which was itself glued on subjects’ skin	8 TVC motion capture system (Vicon1 T40 and T20; 125 Hz); force platform (Kistler1 9281 CA)	FP: transient peak of vertical ground reaction force, loading rate IMU: tibial acceleration peak and rate MOCAP: hip, knee and ankle flexion angles at touch-down and during stance phase (range of motion and maximum values) MIXED: hip, knee and ankle external net joint moments and stiffness	2	acceleration	kinematics, shock	supported procedures	tibial acceleration	building on established	2
186	Bessone V, Petrat J, Schwirtz A	Ground Reaction Forces and Kinematics of Ski Jump Landing Using Wearable Sensors	10.3390/s19092011	2019	Sensors	observational	Pre	assessing sport-related risk of injury/ predictive factors	in field	acute	soft-tissue injuries	lower leg	a. highly trained/national level b. elite/international	a. h: 22M b. h: 1M	NS	skiing	ski jump	1) IMU; 2) pressure sensor	1) myolution GmbH, Ratingen, DE; 2) Novel GmbH, Munich, DE;	1) aktos-t; 2) wireless, connected via Bluetooth to the app loadsol installed on an iPod	1) 143; 2)100	1) 11B; 2) 2E	1) skis; feet; shanks; thighs; pelvis; C7 vertebra; 2) on the arm of the athlete;	1) medical tape under the ski suit; 2) smartphone running case;	3 video cameras; a light barrier at the take-off table	PRESS: rear and fore foot peak normal GRF, flight phase duration, symmetry index of the normal GRF IMU: flexion/extension, abduction/adduction and rotation of the knee and hip, the ankle dorsiflexion and abduction/adduction, and the orientation of the trunk (flexion, abduction and rotation) CAMERA: jump length OTHER: take-off speed	1	pressure, acceleration	temporal, kinematics, joint/segment kinematics, kinetics	reference to former validation	validation studies	exploring	2
187	Boey H, Aeles J, Schütte K, Vanwanseele B	The effect of three surface conditions, speed and running experience on vertical acceleration of the tibia during running	10.1080/14763141.2016.1212918	2016	Sports Biomechanics	quasi-experimental	Pre	assessing sport-related risk of injury/ predictive factors	in field	overuse	skeletal injuries, tibial fracture	shank, tibia, fibula	a. sedentary b. recreationally active c. trained/developmental	a. h: 6F, 6M b. h: 6F, 6M c. h: 6F, 6M	no injury	running	running	3D accelerometer	X-50-2, Gulf Coast Data Concepts, LLC, US	mass= 33g; range = 50g, resolution = 13-bit	1024	1B	on the lower leg (8 cm above the medial malleolus)	double-sided tape and fixated with extra tape	#	IMU: peak positive tibial vertical acceleration	1	acceleration	kinematics, shock	supported procedures	tibial acceleration	building on established	2
188	Willy RW, Buchenic L, Rogacki K, Ackerman J, Schmidt A, Willson JD	In-field gait retraining and mobile monitoring to address running biomechanics associated with tibial stress fracture	10.1111/sms.12413	2016	Scandinavian Journal of Medicine & Science in Sports	observational	Pre	gait retraining	laboratory & in field	overuse	skeletal injuries, tibial fracture	shank, tibia, fibula	recreationally active	h: 30 (gender NS)	healty runners with elevated impact forces	running	treadmill and overground running	3D accelerometer	FR70, Garmin Corporation, Olathe, Kansas, US	NS	1000	1B	shoe	NS	instrumented treadmill (Bertec, Worthington, Ohio, USA)	IMU: step per minute ad a feedback for gait retraining FP: step rate, instantaneous vertical load rate, average vertical load rate MOCAP: peak hip adduction MIXED: eccentric knee joint work per stance phase, eccentric knee joint work per kilometer of running, knee power absorption, total knee power absorption per kilometer of running	3	acceleration	temporal	pilot validation	pilot	exploring	2
189	Bowen L, Gross AS, Gimpel M, Li FX	Accumulated workloads and the acute: chronic workload ratio relate to injury risk in elite youth football players	10.1136/bjsports-2015-095820	2017	British Journal of Sports Medicine	observational	At	assessing sport-related risk of injury/ predictive factors	in field	acute and overuse	soft-tissue and skeletal injuries	full-body	elite/international	h: 32M	NS	soccer	soccer tasks	accelerometer	NS	NS	100	1B	between the scapulae	in besboke vests	GNSS (Viper V.2, StatSports, Ireland; 10Hz)	IMU: number of accelerations MIXED: total distance, high-speed distance, total load	1	acceleration	demographic, player load	no		building on established	2
190	Wood CM, Kipp K	Use of audio biofeedback to reduce tibial impact accelerations during running	10.1016/j.jbiomech.2014.03.008	2014	Journal of Biomechanics	quasi-experimental	Pre	gait retraining	laboratory	overuse	skeletal injuries, tibial fracture	shank, tibia, fibula	recreationally active	h: 6F, 3M	free from musculoskeletal injury	running	treadmill running	3D accelerometer	G-Link-LXRS: LordMicrostrain, Williston, VT	NS	612	1B	antero-medial distal tibia (axes aligned with the cardinal axes of rotation)	tape	#	IMU: peak positive vector sum of the vertical and posterior accelerations	1	acceleration	kinematics, shock	supported procedures	tibial acceleration	building on established	2
191	Faherty M, Varnell M, Csonka J, Salesi K, Gomez S, Sell T	Sex differences in lower extremity musculoskeletal and neuromuscular characteristics in intercollegiate soccer athletes	10.1080/24733938.2019.1628351	2019	Science and Medicine in Football	observational	Pre	assessing sport-related risk of injury/ predictive factors	NS	acute	soft-tissue and skeletal injuries	lower leg	elite/international	h: 41F, 39M	free from LE MSKI within 4 weeks of their test session	soccer	flexibity and balance tasks	accelerometer	NS	NS	NS	1B	subject's center of mass	NS	Handheld dynamometer (Lafayette Instrument Co)	OTHER: joint mobility during active ankle joint dorsiflexion, gastrocnemius flexibility, active knee extension, passive straight leg raise (measuring distances) DYNA: isometric strength during ankle (dorsiflexion, inversion, eversion), knee (flexion, extension), hip (internal rotation, external rotation, abduction, adduction); isomectric strength ratios IMU: dynamic postural stability (anterior/p…	2	acceleration	kinematics	reference to former validation	validation studies	building on established	1
192	Zhang Z, Zhang Y, Fu W, Wei Z, Jiang J, Wang L	Plantar loads of habitual forefoot strikers during running on different overground surfaces	10.3390/app10072271	2020	Applied Sciences	quasi-experimental	Pre	assessing sport-related risk of injury/ predictive factors	in field	overuse	soft-tissue injuries	foot	recreationally active	h: 26M	no surgery and musculoskeletal diseases in lower limbs over the past 6 months	running	running	pressure sensor	Pedar-X system (Version 25.3.6e), Novel GmbH, Munich, DE	NS	100	2E	insole	insole	3-m photoelectric timing system (WittySEM, Microgate, Bolzano, Italia); high-speed video camera (MotionPro X-4, Integrated Design Tools Inc., Pasadena, CA,USA); Multimask evaluation (Novel Multimask, Versione 25.3.6e, Novel, Monaco, Gemania, 2013)	PRESS: peak pressure, maximum force, contact area, integral pressure-time, force-time integral.	1	pressure	kinetics	reference to former validation	validation studies	exploring	3
193	Zhang JH, Chan ZY-S, Au IP-H, An WW, Shull PB, Cheung RT-H	Transfer Learning Effects of Biofeedback Running Retraining in Untrained Conditions	10.1249/MSS.0000000000002007	2019	Medicine & Science in Sports & Exercise	observational	Pre	gait retraining	laboratory	overuse	soft-tissue and skeletal injuries	lower leg	recreationally active	h: 3F, 10M	currently uninjured	running	treadmill running	accelerometer	Noraxon, Scottsdale, AZ, US	range = ±24g, wireless	50	2B	anterior-medial surface of distal tibia (z-axis alongside the longitudinal axis of tibia)	elastic streched band with velcro (from figure)	#	IMU: peak tibial shock	1	acceleration	kinematics, shock	supported procedures	tibial acceleration	exploring	2
194	Zhang JH, Chan ZY-S, Au IP-H, An WW, Cheung RT-H	Can runners maintain a newly learned gait pattern outside a laboratory environment following gait retraining?	10.1016/j.gaitpost.2019.01.014	2019	Gait & Posture	quasi-experimental	Pre	gait retraining	in field	overuse	skeletal injuries, tibial fracture	shank, tibia, fibula	recreationally active	h: 4F, 11M	free of any active lower-limg injuries and known musculoskeletal conditions upon enrolment	running	overground, level/uphill/downhill, treadmill running	accelerometer	Noraxon, Scottsdale, AZ, US	range = ± 24g	500	1B	anterior-medial side of the distal tibia	NS	#	IMU: peak tibial shock	1	acceleration	kinematics, shock	validation	gold standard = photocells	exploring	2
195	Zifchock RA, Davis I, Hamill J	Kinetic asymmetry in female runners with and without retrospective tibial stress fractures	10.1016/j.jbiomech.2005.10.003	2006	Journal of Biomechanics	observational	Pre	assessing sport-related risk of injury/ predictive factors	laboratory	overuse	skeletal injuries, tibial fracture	shank, tibia, fibula	trained/developmental	h: 25F i: 24F	history of one or more unilateral TSFs	running	gait	accelerometer	NS	mass = 2.7g	960	1B	medial, inferior aspect of their tibia along the long axis of the tibia	NS	Photoelectric cells; force plate	IMU: peak shock tibial acceleration FP: peak medial GRF, peak lateral GRF, peak vertical GRF, peak braking GRF, vertical impact peak, average vertical loading rate, peak instantaneous vertical loading rate	2	acceleration	kinematics, shock	no		exploring	2
196	Crowell HP, Davis iS	Gait Retraining to Reduce Lower Extremity Loading in Runners	10.1016/j.clinbiomech.2010.09.003	2011	Journal of Clinical Biomechanics	quasi-experimental	Pre	gait retraining	laboratory	overuse	skeletal injuries, tibial fracture	shank, tibia, fibula	recreationally active	h: 10 (gender NS)	free of injuries; normal tibial acceleration	running	gait	accelerometer	PCB Piezotronics Inc., Depew, NY, US	range = ± 50 g, mass = 5.4 g; model 356A32	1080	1B	anteromedial aspect of the distal tibia (aligned with the tibia long axis)	tape	force plate (Bertec Corp, Worthington, OH, USA); motion capture system (Vicon, Oxford, UK) not used in this study	IMU: peak positive tibial axial acceleration FP: vertical instantaneous loading rate, vertical average loading rate, vertical impact peak	2	acceleration	kinematics, shock	no		building on established	2
197	Vallance, E, Sutton-Charani, N, Imoussaten, A, Montmain, J, Perrey, S.	Combining internal- and external-training-loads to predict non-contact injuries in soccer	10.3390/app10155261	2020	Applied Sciences	observational	At	assessing sport-related risk of injury/ predictive factors	in field	overuse	NS	NS	highly trained/national level	h: 40M	healthy	soccer	soccer match	3D accelerometer, 3D gyroscope	Optimeye S5, Catapult Innovations, Melbourne, AU	NS	100	1B	NS	NS	GNSS (10 Hz)	OTHER: anthropometric: age, mass, height, BMI, role + pre- and post-session questionnaire: sleep quality, fatigue, mood, RPE, satisfaction, pleasure IMU: load-related: player load, duration, distance, accelerations, speed	1	acceleration	player load	reference to former validation	validation studies	building on established	3
198	Verbitsky, O, Mizrahi, J, Voloshin, A, Treiger, J, Isakov, E.	Shock transmission and fatigue in human running	10.1123/jab.14.3.300	1998	Journal of Applied Biomechanics	quasi-experimental	Pre	assessing sport-related risk of injury/ predictive factors	laboratory	overuse	soft-tissue and skeletal injuries	lower leg	sedentary	h: 22M	excellent health ,no previous histories of muscle weakness, neurological disease, or drug therapy	running	treadmill running	1D accelerometer	PCB, Type A303	NS	1667	1B	externally to the tibial tuberosity	by a metal holder strapped on the skin	Sensor-Medics 4400 metabolic cart	IMU: tibial axial acceleration OTHER: oxygen consumption	1	acceleration	kinematics, shock	supported procedures	tibial acceleration	exploring	2
199	Vila Dieguez, O, Barden, J.M.	Body roll differences in freestyle swimming between swimmers with and without shoulder pain	10.1080/14763141.2020.1760923	2020	Sports Biomechanics	observational	Pre	understand sport-related injury mechanisms	in field	overuse	soft-tissue injuries	shoulder	highly trained/national level	h: 6F, 6M i: 6F, 6M	monolateral shoulder pain	swimming	freestyle	3D accelerometer	Activinsights, Cambridgeshire, UK	NS	100	2B	dorsal surface of the swimmer’s pelvis in line with the posterior inferior iliac spines; thoracic vertebrae at the level of the scapular spines	elastic therapeutic tape	Video camera and pelvic markers for 2D video analysis	IMU: shoulder and hip mean peak roll angle, bilateral asymmetry between breathing and non-breathing sides in body roll angles	1	acceleration & angular velocity, orientation	joint/segment kinematics	reference to former validation	validation studies	building on established	2
200	Voloshin, A.S, Bejjani, F.J, Halpern, M, Frankel, V.H.	Dynamic loading on flamenco dancers: A biomechanical study	10.1016/0167-9457(89)90033-X	1989	Human Movement Science	observational	Pre	assessing sport-related risk of injury/ predictive factors	NS	overuse	soft-tissue and skeletal injuries	vertebral column, lower leg	trained/developmental	h: 3F	NS	dancing	flamenco	1D accelerometer	PCB 303A02, Power supply, 408	mass = 2g	1000	2B	tibia1 tuberosity; anterior and superior iliac spine, axis oriented vertically	adhesive tape and a tightly elastic bandage	#	IMU: frequency of the shock waves, amplitudes of the shock waves, peak tibial acceleration	1	acceleration	kinematics, shock, frequency analysis	supported procedures	tibial acceleration	exploring	1
201	Voloshin AS, Mizrahi J, Verbitsky O, Isakov E	Dynamic loading on the human musculoskeletal system effect of fatigue	10.1016/s0268-0033(98)00030-8	1998	Clinical Biomechanics	quasi-experimental	Pre	assessing sport-related risk of injury/ predictive factors	laboratory	overuse	soft-tissue and skeletal injuries	lower leg	sedentary	h: 22M	healthy	running	treadmill running	1D accelerometer	PCB A303, PCB Piezotronics Inc., Depew, NY, USA	mass = 2.3g	NS	2B	tibial tuberosity; sacrum	by a metal holder strapped on the skin by velcro strips as tightly as possible	Sensor-Medics 4400 metabolic cart	IMU: tibial and sacrum acceleration maximum amplitudes, power spectral density mean and median frequency at heel strike OTHER: end-tidal carbon dioxide pressure	1	acceleration	kinematics, shock, frequency analysis	supported procedures	tibial acceleration	exploring	1
202	Esmaeili, A, Hopkins, W.G, Stewart, A.M, Elias, G.P, Lazarus, B.H, Aughey, R.J.	The individual and combined effects of multiple factors on the risk of soft tissue non-contact injuries in elite team sport athletes	10.3389/fphys.2018.01280	2018	Frontiers in Physiology	observational	At	assessing sport-related risk of injury/ predictive factors	in field	acute and overuse	soft-tissue injuries	lower leg	highly trained/national level	h: 55M	quantified by creating two variables: the number of days since return to full training from any previous injuries (contact and non-contact) and from a previous leg injury (contact and non-contact) in order to account for the decaying effects of previous injuries. These variables were reset to zero upon sustaining a relevant new injury and started counting up from one on the first day of return to…	australian football	australian football tasks; lunge test, sit-and-reach, and adductor squeeze test	accelerometer	Optimeye S5, Catapult Innovations, AU	NS	NS	1B	NS	NS	GNSS	MIXED: rating of perceived exertion (sRPE) for all training sessions and matches, player load, total distance covered, high-intensity running distance, derived measures of training load (cumulative loads, rolling average acute-to-chronic workload ratios, smoothed acute-to-chronic workload ratios, training monotony, training strain)	1	acceleration	kinematics, demographic, player load	reference to former validation	validation studies (Player-Load™)	building on established	3
203	Wilkerson GB, Gupta A, Allen, JR, Keith CM, Colston MA	Utilization of practice session average inertial load to quantify college football injury risk	10.1519/jsc.0000000000001370	2016	Journal of Strength and Conditioning Research	observational	At	assessing sport-related risk of injury/ predictive factors	in field	acute and overuse	soft-tissue injuries	full-body	elite/international	h: 45M	NS	american football	american football tasks	3D accelerometer	Optimeye S5, Catapult Sports USA, Chicago, IL, US	NS	100	1B	upper back	NS	#	IMU: player load and its coefficient of variation OTHER: total number of game plays for each member	1	acceleration	demographic, player load	reference to former validation	validation studies	building on established	3
204	Wilkerson, G. B, Gupta, A, Colston, M. A.	Mitigating Sports Injury Risks Using Internet of Things and Analytics Approaches	10.1111/risa.12984	2018	Risk Analysis	observational	At	assessing sport-related risk of injury/ predictive factors	laboratory & in field	acute	soft-tissue injuries	full-body	elite/international	h: 43M	NS	American football	squat	3D accelerometer	NS	NS	100	1B	between the scapulae	strap	mobile application (Sway Medical, LLC, Tulsa, OK, USA)	IMU: instantaneous change in body mass acceleration OTHER: number and type of injuries, Sport Fitness Index, Unilateral Forefoot Squat, Sport Fitness Index x Unilateral Forefoot Squat interaction, games played during season	2	acceleration	kinematics	no		building on established	2
205	Wellman AD, Coad SC, Goulet GC, Mclellan CP	Quantification of accelerometer derived impacts associated with competitive games in National Collegiate Athletic Association division I college football players	10.1519/JSC.0000000000001506	2016	Journal of Strength and Conditioning Research	observational	Pre	assessing sport-related risk of injury/ predictive factors	in field	overuse	soft-tissue and skeletal injuries	NS	elite/international	h: 33M	NS	american football	american football tasks	3D accelerometer	NS	mass= 66g; dimension= 74 x 42 x 16 mm^3	100	1B	in the center of the upper back (slightly superior to the scapulae)	attached to the shoulder pads of the subjects	GNSS (15 Hz)	IMU/MIXED: number and intensity of collision, peak impacts, peak acceleration	1	acceleration	kinematics, demographic	supported procedures	tibial acceleration	exploring	1
206	Supej M, Ogrin J, Holmberg H-C	Whole-body vibrations associated with alpine skiing: A risk factor for low back pain?	10.3389/fphys.2018.00204	2018	Frontiers in Psychiatry	observational	Pre	assessing sport-related risk of injury/ predictive factors	in field	overuse	soft-tissue and skeletal injuries	vertebral column	NS / Insufficient data to be classified	h: 8 (gender NS)	NS	skiing	six different forms of alpine skiing	accelerometer	a. 3097A2, Dytran Instruments Inc., Chatsworth, CA, US; b. 7300A5, Dytran Instruments Inc., Chatsworth, CA, US	a. mass = 4.3 g; range = 50g; sensitivity = 100 mV/g; b. mass = 12g; range = 50g; sensitivity = 80 mV/g	5000	3B; 2E	a. ski boot’s lower shell and head; b. waist	a. ski boot’s lower shell and helmet; b. belt tightened around and taped to the body	GNSS (ST 1612 G, Locosys Technology Inc., Taipei, Taiwan; 10 Hz)	IMU: power spectrum densities (PSD), ground reaction forces, accelerations of the superior-inferior axis, accelerations of the sacrum OTHER: skier’s speed	1	acceleration	kinematics, kinetics, frequency analysis	supported procedures	ISO	building on established	1
207	Supej M, Ogrin J	Transmissibility of whole-body vibrations and injury risk in alpine skiing	10.1016/j.jsams.2019.02.005	2019	Journal of Science and Medicine in Sport	observational	Pre	assessing sport-related risk of injury/ predictive factors	in field	overuse	soft-tissue and skeletal injuries	vertebral column	NS / Insufficient data to be classified	h: 8 (gender NS)	NS	skiing	alpine skiing	accelerometer	a. 3097A2, Dytran Instruments Inc., Chatsworth, CA, US; b. 7300A5, Dytran Instruments Inc., Chatsworth, CA, US	a. mass = 4.3 g; range = 50g; sensitivity = 100 mV/g; b. mass = 12g; range = 50g; sensitivity = 80 mV/g	5000	3B; 4E	a. ski boot’s lower shell and head; b. waist	a. ski boot’s lower shell and helmet; b. belt tightened around and taped to the body	#	IMU: accelerations of the superior-inferior and anterior-posterior axes, 3D accelerations of the sacrum	1	acceleration	kinematics	supported procedures	ISO	exploring	3
208	Swaminathan R, Williams MJ, Jones DM, Theobald S. P	A kinematic analysis of the spine during rugby scrummaging on natural and synthetic turfs	10.1080/02640414.2015.1088165	2016	Journal of Sports Sciences	observational	Pre	assessing sport-related risk of injury/ predictive factors	in field	acute	skeletal injuries	vertebral column	NS / Insufficient data to be classified	h: 22 (gender NS)	no major spinal injury in the past or indication of current neuromusculoskeletal neck problems	rugby	scrummaging	IMU	ThetaMetrix, Waterlooville, UK	NS	40	6B	forehead; spinous processes of C7, T7, T12, L3 and S1	hypoallergenic doublesided tape, with all trailing wires secured using Hypafix tape	#	IMU: angular velocity magnitude, spine segment orientations and RoM	1	angular velocity, orientation	kinematics, joint/segment kinematics	no		building on established	1
209	Tenforde, A.S, Hayano, T, Jamison, S.T, Outerleys, J, Davis, I.S.	Tibial Acceleration Measured from Wearable Sensors Is Associated with Loading Rates in Injured Runners	10.1002/pmrj.12275	2020	PM and R	observational	Pre	assessing sport-related risk of injury/ predictive factors	laboratory	overuse	soft-tissue and skeletal injuries	lower leg	NS / Insufficient data to be classified	i: 169 (gender NS)	injured runners (seeking medical attention and pain lasting 7 or more days that interferes with running)	running	treadmill running	3D accelerometer	IMeasureU, Auckland, NZ	mass= 12 g; dimensions = 40 × 28 × 15 mm^3	1000	1B	distal medial portion of the tibia above medial malleolus (vertical axis aligned with tibia long axis, positive vertical towards proximal end)	manufacturer supplied Velcro strap, fastened "to be snug but not overly tight" by the patient	instrumented force treadmill (AMTI, Watertown, MA; 1500 Hz); video (125 Hz)	IMU: peak vertical and resultant tibial acceleration FP: vertical average and instantaneous loadrates, resultant instantaneous loadrate	2	acceleration	kinematics, shock	supported procedures	tibial acceleration	exploring	2
210	Thompson M, Seegmiller J, McGowan CP	Impact accelerations of barefoot and shod running	10.1055/s-0035-1569344	2016	International Journal of Sports Medicine	quasi-experimental	Pre	assessing sport-related risk of injury/ predictive factors	laboratory	overuse	soft-tissue and skeletal injuries	lower leg	NS / Insufficient data to be classified	h: 5F, 5M	healthy	running	running	2D accelerometer	MMA3202KEG, Freescale Semiconductor, Austin, TX	range = 50g; sensitivity= 20 mV/g	1000	2B	lateral surface of the distal lower leg; lateral surface of the forehead	coban wrap and elastic band	camera Vicon motion analysis system (Vicon Motion Systems Ltd., Oxford, England, @250 Hz)	IMU: peak tibia resultant acceleration MOCAP: stride length, velocity, ankle, knee and hip 3D kinematics FP: loading rate, peak vertical ground reaction force, peak anterior-posterior ground reaction force, peak medio-lateral ground reaction force	2	acceleration	kinematics, shock	validation	gold standard = stereophotogrammetry	building on established	2
211	Townshend, A.D, Franettovich Smith, M.M, Creaby, M.W.	The energetic cost of gait retraining: A pilot study of the acute effect	10.1016/j.ptsp.2016.08.010	2017	Physical Therapy in Sport	observational	Pre	assessing sport-related risk of injury/ predictive factors	laboratory	overuse	soft-tissue and skeletal injuries	lower leg	recreationally active	h: 12M	healthy	running	running	1D accelerometer	PCB356A32/NC, PCB Piezotronics Inc., Buffalo, NY, US	NS	1500	1B	antero-medial distal tibia	NS	metabolic cart (Medgraphics Ultima CPX, Medical Graphics Corporation, MN)	IMU: tibial peak positive acceleration OTHER: oxygen consumption (VO2)	2	acceleration	kinematics, shock	pilot validation	pilot	exploring	2
212	Tranquilli, C, Bernetti, A, Picerno, P.	Ambulatory joint mobility and muscle strength assessment during rehabilitation using a single wearable inertial sensor	#	2013	Medicina Dello Sport	validation	Post	post injury monitoring or return to play assessment	in field	acute	soft-tissue injuries	shoulder	NS / Insufficient data to be classified	i: 1 (gender NS)	SLAP tear in the left shoulder	swimming	joint mobility and muscle strength tests	IMU	FreeRehab, Sensorize, IT	NS	NS	a.1B b.1E	a. an arbitrary orientation, on an arbitrary point of the upper arm (abduction and flexion/extension movements) on the forearm (external and internal rotation of the shoulder) b. arbitrary point of the pulley’s weight-stack with arbitrary orientation	a. using an elastic belt b. using a magnetic pocket	#	IMU: RoM, movement fluidity, movement velocity (in the joint mobility test); mean force, mean velocity, mean mechanical power during the concentic phase of the movement (in the strength test)	1	orientation	temporal, kinematics, joint/segment kinematics, kinetics	reference to former validation	validation studies	exploring	1
213	Feigenbaum, L. A, Gaunaurd, I. A, Kim, K. J, Raya, M. A, Ruiz, J. T, Rapicavoli, J, ... & Gailey, R. S.	Accuracy of the Region of Limb Stability in Predicting Risk for Lower Limb Injury	10.1249/MSS.0000000000002384	2020	Medicine & Science in Sports & Exercise	validation	At	setting injury threshold criteria	in field	acute	soft-tissue injuries, ACL	knee	NS / Insufficient data to be classified	h: 70 (gender NS) i: 34 (gender NS)	injured group = subjects healthy during the preseason, but acquired an injury that required surgery during the current season; noninjured group = subjects healthy during the preseason, did not acquire an injury during the current season	american football	single limb stance test	3D accelerometer, 3D gyroscope, 3D magnetometer	CaneSense™	dimensions = 25 x 25 x 12.5 mm^3; range = ± 160 m/s at 10-bit resolution; range = ±2000deg/s at 16 bits; range = ±2500 nT at 13 bits	50	4B	medial–tibial flare and lateral–proximal thigh (just anterior to the insertion of the iliotibial band)	in two elastic knee sleeves (two IMU per knee sleeve)	#	IMU: region of limb stability (statokinesiogram at the knee level), region of limb stability symmetry	1	acceleration	kinematics	reference to former validation	validation studies	building on established	3
214	Ueberschär, O, Fleckenstein, D, Warschun, F, Kr√§nzler, S, Walter, N, Hoppe, M.W.	Measuring biomechanical loads and asymmetries in junior elite long-distance runners through triaxial inertial sensors	10.1016/j.orthtr.2019.06.001	2019	Sports Orthopaedics and Traumatology	observational	Pre	assessing sport-related risk of injury/ predictive factors	laboratory & in field	overuse	skeletal injuries, tibial fracture	shank, tibia, fibula	a. highly trained/national level b. recreationally active	a. h:27M, 18F b. h:8M	NS	running	running	3D accelerometer, 3D gyroscope	MTw Awinda, Xsens Technologies B.V. Enschede, NL	mass = 16g; dimensions= 47 x 30 x 13 mm^3	1000	5B	distal antero-medial section of tibia; scapula; sacrum	Velcro straps, Velcro tape and Leukotape	GNSS - enabled sports watches (Garmin Forerunner 910XT or comparable)	IMU: peak tibial, sacral and scapular accelerations, asymmetry between left and right side	1	acceleration	kinematics	reference to former validation	validation studies	building on established	1
215	Sinclair, J, Bottoms, L, Taylor, P. J. Mahmood, K.	Effects of shoes on kinetics and kinematics of the squash forward lunge in male players	10.26582/k.49.2.9	2017	Kinesiology	quasi-experimental	Pre	characterising protective devices	laboratory	acute and overuse	soft-tissue and skeletal injuries	lower leg	trained/developmental	h: 12M	NS	squash	lunge movement	3D accelerometer	Biometrics ACL 300, Gwent, UK	NS	1000	1B	distal anterio-medial aspect of the tibia (aligned with its longitudinal axis 0.08 m above the medial malleolus)	attached onto a piece of lightweight carbon-fibre material by strong nonstretch adhesive tape	force platform (Kistler, Kistler Instruments Ltd., Alton, Hampshire; 1000 Hz) Eight camera optoelectric motion capture system (Qualisys Medical AB, Goteburg, Sweden, @ 250 Hz.)	MOCAP: kinematic measures ankle and tibia (angle at footstrike, peak angle, and relative range of motion) FP: loading rate, instantaneous loading rate, peak impact force and time to peak impact IMU: peak tibial acceleration, tibial acceleration slope	2	acceleration	kinematics, shock	validation	gold standard = stereophotogrammetry	building on established	1
216	Sinclair J, Bottoms L, Taylor K, Greenhalgh A	Tibial shock measured during the fencing lunge: the influence of footwear	10.1080/14763141.2010.491161	2010	Sports Biomechanics	quasi-experimental	Pre	characterising protective devices	NS	overuse	NS	NS	trained/developmental	h: 19M	NS	fencing	fencing lunge	3D accelerometer	Biometrics ACL 300, Gwent, UK	mass = 9 g; range ± 100 g; voltage sensitivity = 100mV/g	1000	1B	distal anteromedial shank, 8 cm above medial maleolus	mounted on a piece of lightweight carbon-fibre material; taped over with strong adhesive tape	#	IMU: peak tibial shock	1	acceleration	kinematics, shock	supported procedures	tibial acceleration	exploring	1
217	Sinclair, J, Taylor, P.J, Hobbs, S.J.	Kinematic regulation of time and frequency domain components of accelerations measured at the tibia during heel-toe running	10.2478/humo-2014-0002	2014	Human Movement	observational	Pre	assessing sport-related risk of injury/ predictive factors	laboratory	overuse	soft-tissue and skeletal injuries	lower leg	NS / Insufficient data to be classified	h:40M	rearfoot strikers free of musculoskeletal injury	running	running	3D accelerometer	ACL300, Biometrics, UK	mass = 9g	1000	1B	anterior-medial tibia	mounted on a piece of lightweight carbon fibre and applied with adhesive tape.	force plate(Kistler Instruments Ltd.,UK); powertimers 300 series infrared timing gates(Newtest Oy,Finland); 8 TVC motion capture system(Qualisys Medical AB,Sweden)	IMU: tibial acceleration MOCAP: ankle, knee and hip joint kinematics, angle at footstrike, angle at toe-off, range of motion during stance, peak angle during stance, relative range of motion from footstrike to peak angle, angular velocity at footstrike, angular velocity at toe-off and peak angular velocity OTHER: running velocity FP: used to classify participant according to their GRF profile (al…	2	acceleration	kinematics, shock	supported procedures	tibial acceleration	exploring	2
218	Slaughter, P.R, Adamczyk, P.G.	Tracking quantitative characteristics of cutting maneuvers with wearable movement sensors during competitive women’s ultimate frisbee games	10.3390/s20226508	2020	Sensors	observational	Pre	assessing sport-related risk of injury/ predictive factors	in field	acute	soft-tissue injuries, ACL	knee	trained/developmental	h: 12F	NS	ultimate frisbee	cutting maneuvers	3D accelerometer, 3D gyroscope, 3D magnetometer	MVN Awinda, Xsens Technologies B.V. Enschede, NL	range = ±160m/s^2; range = ±2000deg/s; range =±1.9Gauss ; 9 DoF; buffer: 50-m range or 10 s	60 or 100	7B	feet; shanks; thighs; pelvis	NS	#	IMU: number of approach steps, number of exit steps, approach and exit speeds, and cut angle, footfall speed and acceleration, mean knee flexion	1	acceleration & angular velocity, orientation	kinematics, joint/segment kinematics, demographic	supported procedures	vendors	building on established	1
219	Spörri J, Kröll J, Aminian K, Müller E	Course setting as a Prevention Measure for Overuse Injuries of the Back in Alpine Ski Racing. A Kinematic and Kinetic Study of Giant Slalom and Slalom	10.1177/2325967116630719	2016	Orthopaedic Journal of Sports Medicine	quasi-experimental	Pre	assessing sport-related risk of injury/ predictive factors	in field	overuse	soft-tissue and skeletal injuries	vertebral column	elite/international	h:10 (gender NS)	no previous history of recurrent or chronic back pain	skiing	alpine skiing	1) 3D accelerometer, 3D gyroscope; 2) pressure sensor	1) Physilog, Gait Up, CH; 2) Pedar, Novel GmbH, Munich, DE	NS	1) 500; 2) 100	1) 2B; 2) 2E	1) sacrum; sternum; 2) insole	1) custom-made, skin-tight underwear suit; 2) insole	#	IMU: 3D angular velocity, 3D acceleration, 3D segment orientations PRESS: total ground-reaction forces	2	acceleration & angular velocity, orientation	kinematics, joint/segment kinematics	reference to former validation	validation studies	building on established	1
220	Spörri J, Kröll J, Aminian K, Müller E	The Use of Body Worn Sensors for Detecting the Vibrations Acting on the Lower Back in Alpine Ski Racing	10.3389/fphys.2017.00522	2017	Frontiers in Physiology	observational	Pre	assessing sport-related risk of injury/ predictive factors	in field	overuse	soft-tissue and skeletal injuries	vertebral column	elite/international	h: 6M	NS	skiing	alpine skiing	3D accelerometer, 3D gyroscope	Physilog IV, Gait Up, CH	mass = 19g; dimensions = 50 × 39 × 9.2 mm^3	500	6B	shank; thigh; sacrum; sternum	fixed using a custom-made, skin-tight underwear suit and using their own very close-fitting racing suit	#	IMU: 3D angular velocity, 3D acceleration, 3D segment orientations, power spectral density, root-mean-square acceleration	1	acceleration & angular velocity, orientation	kinematics, joint/segment kinematics, frequency analysis	reference to former validation	validation studies	building on established	3
221	Spörri J, Kröll J, Fasel B, Aminian K, Müller E	Standing Height as a Prevention Measure for Overuse Injuries of the Back in Alpine Ski Racing. A Kinematic and Kinetic Study of Giant Slalom	10.1177/2325967117747843	2018	Orthopaedic Journal of Sports Medicine	quasi-experimental	Pre	characterising protective devices	in field	overuse	soft-tissue and skeletal injuries	vertebral column	elite/international	h:7 (gender NS)	NS	skiing	alpine skiing	1) 3D accelerometer, 3D gyroscope; 2) pressure sensor	1) Physilog, Gait Up, CH; 2) Pedar, Novel GmbH, Munich, DE	NS	1) 500; 2) 100	1) 2B; 2) 2E	1) sacrum; sternum; 2) insole	1) custom-made, skin-tight underwear suit; 2) insole	#	IMU: 3D angular velocity, 3D acceleration, 3D segment orientations PRESS: total ground-reaction forces	2	acceleration & angular velocity, orientation	kinematics, joint/segment kinematics	reference to former validation	validation studies	exploring	1
222	Spörri J, Kröll J, Haid C, Fasel B, Müller E	Potential Mechanisms Leading to Overuse Injuries of the Back in Alpine Ski Racing: A Descriptive Biomechanical Study	10.1177/0363546515588178	2015	The American Journal of Sports Medicine	observational	Pre	assessing sport-related risk of injury/ predictive factors	in field	overuse	soft-tissue and skeletal injuries	vertebral column	elite/international	h: 8 (gender NS)	NS	skiing	alpine skiing	1) 3D accelerometer, 3D gyroscope; 2) pressure sensor	1) Physilog, Gait Up, CH; 2) Pedar, Novel GmbH, Munich, DE	NS	1) 500; 2) 100	1) 2B; 2) 2E	1) sacrum; sternum; 2) insole	2) insole	#	IMU: trunk frontal and lateral bending, trunk torsion PRESS: total ground reaction force	1	orientation, pressure	joint/segment kinematics, kinetics	reference to former validation	validation studies	building on established	1
223	Setuain, I, Bikandi, E, Amu-Ruiz, F. A, Izquierdo, M.	Horizontal jumping biomechanics among elite male handball players with and without anterior cruciate ligament reconstruction. An inertial sensor unit-based study	10.1016/j.ptsp.2019.06.009	2019	Physical Therapy in Sport	observational	Pre	assessing sport-related risk of injury/ predictive factors	in field	acute	soft-tissue injuries, ACL	knee	elite/international	h: 20M i: 6M	6 ACL-reconstructed athletes	handball	horizontal jumping	3D accelerometer, 3D gyroscope, 3D magnetometer	MTx, 3DOF Human Orientation Tracker, Xsens Technologies B.V. Enschede, NL	NS	101	1B	L3-L4 vertabrae	NS	meter	IMU: jump phase duration, peak ground reaction force OTHER: jumping performance (distance) MIXED: mechanical efficiency ratio = ratio between jumping performance and sum of peak ground reaction forces	1	acceleration	temporal, kinetics	validation	gold standard = stereophotogrammetry	exploring	1
225	Fu W , Liu Y, Zhang S	Effects of Footwear on Impact Forces and Soft Tissue Vibrations during Drop Jumps and Unanticipated Drop Landings	10.1055/s-0032-1327696	2012	Orthopedics & Biomechanics	quasi-experimental	Pre	characterising protective devices	laboratory	acute	soft-tissue injuries	lower leg	trained/developmental	h: 12M	no known musculoskeletal injuries of lower extremity in the previous 6 months	basketball	drop jump and landing	2D accelerometer	Biovision Corp., Wehrheim, DE	mass= 4g; dimensions = 14 x 9 x 5 mm^3; range = ± 20 g with a bandwidth of DC – 1000 Hz	1200	2B; 1E	rectus femoris; biceps femoris; the heelcup of the shoe	glue and secured with adhesive tape	8 TVC motion capture system (Vicon MX, Oxford Metrics, UK); 2 90 × 60 cm force platforms (9287B, Kistler Corporation,Switzerland)	IMU: soft-tissue vibrations of the leg transmissibility of the shoe acceleration to the soft-tissue compartments MOCAP: dominant lower extremity 3D kinematics FP: ground reaction force	2	acceleration	kinematics	supported procedures	tibial acceleration	exploring	1
225	Setuain I, Bikandi E, Amú Ruiz FA, Urtasun F, Izquierdo M	Horizontal jumping biomechanics among elite female handball players with and without anterior cruciate ligament reconstruction: an ISU based study.	10.1186/s13102-019-0142-8	2019	BMC Sports Science, Medicine and Rehabilitation	observational	Pre	assessing sport-related risk of injury/ predictive factors	in field	acute	soft-tissue injuries, ACL	knee	elite/international	h: 15F i: 6F	6 athletes who had undergone ACL reconstruction, two of them bilaterally, and 15 uninjured controls	handball	horizontal jumping	3D accelerometer, 3D gyroscope, 3D magnetometer	MTx, 3DOF Human Orientation Tracker, Xsens Technologies B.V. Enschede, NL	NS	100	1B	L3-L4 vertabrae	NS	#	IMU: peak forces (obtained as F=m*a), mechanical efficiency ratio = ratio between jumping performance (distance) and the sum of the peak ground reaction forces	1	acceleration	kinematics, kinetics	supported procedures	procedure studies	building on established	1
226	Setuain I, Millor N, González-Izal M, Gorostiaga EM, Gómez M, Alfaro-Adrián J, Maffiuletti NA & Izquierdo M	Biomechanical jumping differences among elite female handball players with and without previous anterior cruciate ligament reconstruction: a novel inertial sensor unit study	10.1080/14763141.2015.1060253	2015	Sports Biomechanics	observational	Pre	assessing sport-related risk of injury/ predictive factors	laboratory	acute	soft-tissue injuries, ACL	knee	highly trained/national level	h: 15F i: 6F	6 ACL-reconstructed 15 uninjured controls	handball	bilateral and unilateral vertical jump	3D accelerometer, 3D gyroscope, 3D magnetometer	MTw, 3DOF Human Orientation Tracker, Xsens Technologies B.V. Enschede, NL	NS	100	1B	L3	NS	#	IMU: peak acceleration and orientation, timing	1	acceleration, orientation	temporal, kinematics	supported procedures	procedure studies	building on established	1
227	Setuain, I, Gonzalez-Izal, M, Alfaro, J, Gorostiaga, E, Izquierdo, M.	Acceleration and Orientation Jumping Performance Differences Among Elite Professional Male Handball Players With or Without Previous ACL Reconstruction: An Inertial Sensor Unit-Based Study	10.1016/j.pmrj.2015.05.011	2015	PM and R	observational	Pre	assessing sport-related risk of injury/ predictive factors	in field	acute	soft-tissue injuries, ACL	knee	highly trained/national level	h: 16M i: 6M	6 ACL-reconstructed athletes	handball	bilateral and unilateral vertical jump	3D accelerometer, 3D gyroscope, 3D magnetometer	MTw, 3DOF Human Orientation Tracker, Xsens Technologies B.V. Enschede, NL	NS	100	1B	L3	NS	#	IMU: jump phase duration, peak 3D acceleration and orientation	1	acceleration, orientation	temporal, kinematics	supported procedures	procedure studies	exploring	1
228	Setuain, I, Lecumberri, P, Izquierdo, M.	Sprint mechanics return to competition follow-up after hamstring injury on a professional soccer player: A case study with an inertial sensor unit based methodological approach	10.1016/j.jbiomech.2017.08.010	2017	Journal of Biomechanics	observational	Post	post injury monitoring or return to play assessment	in field	acute	soft-tissue injuries	thigh, femur	highly trained/national level	i: 1M	a grade 1 right biceps femoris long head injury	soccer	running	3D accelerometer, 3D gyroscope, 3D magnetometer	MTw, 3DOF Human Orientation Tracker, Xsens Technologies B.V. Enschede, NL	NS	100	1B	L3-L4 vertebrae	NS	photoelectric cells (Microgate Systems, Bolzano, Italy)	IMU: spatiotemporal parameters. istantaneous velocity, force ratio = ratio between the horizontal force and the resultant force in the sagittal plane (photo cells used to correct for drift)	1	acceleration & angular velocity	temporal, kinetics	reference to former validation	validation studies	exploring	2
229	Sheerin KR, Reid D, Taylor D, Besier TF	The effectiveness of real-time haptic feedback gait retraining for reducing resultant tibial acceleration with runners.	10.1016/j.ptsp.2020.03.001	2020	Physical Therapy in Sport	quasi-experimental	Pre	gait retraining	laboratory & in field	overuse	skeletal injuries, tibial fracture	shank, tibia, fibula	trained/developmental	h: 19 (gender NS)	healthy	running	treadmill and overground running	a. IMU; b. accelerometer	a. IMeasureU, Auckland, NZ; b. SparkFun 9DoF Razor IMU, SparkFun Electronics, CO, US	a. NS; b. NS	a. 1000; b. NS	a. 1B; b. 1B	a. antero-medial tibiae; b. lower calf	a. NS; b. NS	GNSS watch (Garmin Forerunner 235, Garmin Ltd, Schaffhausen, Svizzera)	IMU: resultant tibial acceleration	1	acceleration	kinematics, shock	supported procedures	tibial acceleration	exploring	3
230	Sheerin, K.R, Besier, T.F, Reid, D.	The influence of running velocity on resultant tibial acceleration in runners	10.1080/14763141.2018.1546890	2020	Sports Biomechanics	quasi-experimental	Pre	assessing sport-related risk of injury/ predictive factors	laboratory	overuse	soft-tissue and skeletal injuries	lower leg	trained/developmental	h: 20F, 65M	healthy	running	treadmill running	3D accelerometer	IMeasureU, Auckland, NZ	mass = 12 g; range = ±16 137 g; resolution = 16 bit	1000	2B	distal antero-medial tibiae (3 cm superior to the crest of the medial malleolus)	with double-sided tape to the skin, then wrapped tightly in elastic adhesive bandage (Amtech, Auckland, New Zealand)	instrumented treadmill (Bertec, Columbus, OH, USA)	IMU: resultant peak tibial acceleration, similarity of peak acceleration values between right and left legs (symmetry index)	1	acceleration	kinematics, shock	supported procedures	tibial acceleration	building on established	2
231	Simons C, Bradshaw EJ	Do accelerometers mounted on the back provide a good estimate of impact loads in jumping and landing tasks?	10.1080/14763141.2015.1123765	2016	Sports Biomechanics	validation	Pre	assessing sport-related risk of injury/ predictive factors	laboratory	overuse	soft-tissue and skeletal injuries	vertebral column	recreationally active	h: 12F	healthy	gymnastics	double-legged hops; drop landings and rebound jumps	3D accelerometer	Minimaxx S4, Catapult, Docklands, Victoria, AU	mass = 10g	100	2B	upper back over the second thoracic vertebra (T2); lower back, at the midpoint between the two posterior superior iliac spines of the pelvis	tight-fitting crop top; double-sided tape and Fixomull stretch tape (Jiaxing How Sport Medical Instrument, Jiaxing, Zhejiang, China) and tight-fitting leggings or compressions pants	stadiometer (Stadi-O-Meter, Novel Products Inc, Rockton, Illinois, USA); uniaxial force platform (Quattro 9290AD, Kistler Group, Winterthur, Switzerland); 2 portable triaxial force platforms (9286BA, Kistler Group, Winterthur, Switzerland; 1000 Hz)	IMU: peak resultant accelerations FP: vertical ground reaction force, peak resultant ground reaction force	1	acceleration	kinematics	validation	gold standard = force platform	exploring	1
232	Rojas-Valverde, D, Sánchez-Ureña, B, Pino-Ortega, J, Gómez-Carmona, C, Gutiérrez-Vargas, R, Timón, R, Olcina, G.	External workload indicators of muscle and kidney mechanical injury in endurance trail running	10.3390/ijerph16203909	2019	International Journal of Environmental Research and Public Health	observational	At	assessing sport-related risk of injury/ predictive factors	in field	overuse	soft-tissue injuries	NS	highly trained/national level	h: 20M	after competition, kidney injury showed the greatest change between pre- vs. -post0h, while in muscle damage the highest change was shown between pre- vs. -post24h. A total of 4/20 (20%) cases met diagnosis criteria for exertional rhabdomyolysis and 11/20 (55%) cases met diagnosis criteria for Acute Kidney Injury risk and 3/20 (15%) Acute Kidney Injury.	running	trail running	IMU	WIMU PROTM, RealTrack Systems, Almeria, ES	NS	NS	6B	T2–T4; L1–L3; vastus lateralis muscle bellies; 3 cm cephalic to right and left malleolus peroneus	special spandex dark-suit which incorporated dark elastic straps	#	OTHER: serum creatine, serum creatine kinase, serum urein nitrogen, serum albumin IMU: player load per min, player load difference between segments, approximated entropy, maximum, total and average accelerations, total and average decelerations, maximum and average speed, metabolic power, high metabolic load distance, explosive distance, maximum and average heart rate, total impacts	2	acceleration	player load	reference to former validation	validation studies	exploring	2
233	Rosero-Montalvo, P. D, Dibujes, A, Vasquez-Ayala, C, Umaquinga-Criollo, A, Michilena, J. R, Suarez, L, Flores, S, Jaramillo, D.	Intelligent System of Squat Analysis Exercise to Prevent Back Injuries	10.1007/978-3-030-02828-2_15	2019	Information and Communication Technologies of Ecuador	validation	Pre	assessing sport-related risk of injury/ predictive factors	laboratory	overuse	soft-tissue injuries	vertebral column	NS / Insufficient data to be classified	h: 20 (gender NS)	NS	performance tests	squat	accelerometer	AXDL, Analog Devices, MA, US	NS	8 MHz	1B; 1E	weightlifting belt; barbell bar	NS	#	bar and back angles	1	orientation, pressure	kinematics	no		building on established	1
234	Sampson, J.A, Murray, A, Williams, S, Halseth, T, Hanisch, J, Golden, G, Fullagar, H.H.K.	Injury risk-workload associations in NCAA American college football	10.1016/j.jsams.2018.05.019	2018	Journal of Science and Medicine in Sport	observational	At	assessing sport-related risk of injury/ predictive factors	in field	acute and overuse	soft-tissue injuries	full-body	elite/international	h: 52M	NS	american Football	american Football tasks	accelerometer	Catapults Innovations, Melbourne, AU	NS	100	1B	ns (from other studies, betweeen the scapulae)	NS (from other studies, custom harness)	GNSS	IMU: player load	1	acceleration	player load	supported procedures	vendors	exploring	3

## Sheet: legends
LEGEND	TABLE ENTRY - definition
STRENGHT OF EVIDENCE	Experimental
	Quasi-experimental
	Observational
	Validation
TIME SETTING	Pre
	At
	Post
SCOPE	Understand sport-related injury mechanisms
	Assessing sport-related risk of injury/ predictive factors
	Setting injury threshold criteria
	Characterising protective devices
	Post injury monitoring or return to play assessment
	Gait retraining
	Other
SETTING	laboratory
	in field
	laboratory & in field
	NS - not specified
													IRL
INJURY TYPE	Acute
	Overuse
	Acute and overuse
TISSUE AFFECTED	Soft-tissue injuries
	Soft-tissue injuries, ACL
	Soft-tissue injuries, ankle sprain
	Skeletal injuries
	Skeletal injuries, tibial fracture
	Soft-tissue and skeletal injuries
	NS - not specified
BODY REGION	Head, face
	Vertebral column
	Head, vertebral column
	Abdomen
	Vertebral column, lower leg
	Lower leg
	Hip
	Knee
	Ankle
	Foot
	Thigh, femur
	Shank, tibia, fibula
	Upper arm, elbow
	Shoulder
	Elbow
	Wrist, hand
	Full-body
	NS - not specified
PARTICIPANTS LEVEL OF SPORT	sedentary
	recreationally active
	trained/developmental
	highly trained/national level
	elite/international
	world class
	NS - not specified / Insufficient data to be classified
PARTICIPANTS NUMBER	h - healthy
	i - injuried
	M - male
	F - female
DEVICE NUMBER OF UNITS	B - on the body
	E - on sport equipment
MEASUREMENT	IMU - inertial measurement unit/ magneto-inertial measurement unit
	CAMERA - video camera
	FP/DYNA - force plates or dynamometers
	MOCAP - motion capture
	EMG - electromyography
	PRESS - pressure sensors
	MIXED - combination of previously mentioned
	OTHER
	MODEL - models/simulation (no instruments)
ROLE OF IMU-BASED MEASUREMENT	1 - wearables-based parameters are crucial
	2 - wearables-based parameters not crucial (among other parameters estimated)
	3 - wearables-based parameters of marginal importance
CAUSAL RELATIONSHIP	Building on established - explicit reference to the literature (or data) that proves the link parameter-injury
	Exploring - no reference to the link that relates parameters to injury
DEVICE POSITION		upper trunk
		lower trunk
		trunk
		thigh
		shank
		foot
PARTICIPANTS NUMBER
	ROLE OF IMU-BASED PARAMETERS
	Relevance of wearables-based parameters: 1 = wearables-based parameters are crucial 2 = wearables-based parameters not crucial (among other parameters estimated) 3 = wearables-based parameters of marginal importance
	L	left
	R	right
	B body
	E equipment
	HISTORY OF INJURY quando sono analizzati atleti infortunati
	HOW MANY specificare se healthy (h: ) o infortunati (i: )
	TYPE descrivere specificamente l'injury della quale si parla e la classificazione secondo le voci indicate nei criteri di inclusione alla voce type of assessment
	RELEVANT LITERATURE letteratura citata a supporto del fatto che i parametri misurati siano predittivi di eventuale infortunio
